# Supplementary material for: Comparative genomic and transcriptomic analyses of the Fuzhuan brick tea-fermentation fungus Aspergillus cristatus
Source: PubMed Central journal article supplement (PMC4895823; doi:10.1186/s12864-016-2637-y), 2016-06-07
Supplement: 12864_2016_2637_MOESM1_ESM.pdf [file 12864_2016_2637_MOESM1_ESM.pdf]

## Additional files 2

**Table S1 *Aspergillus cristatus* Genome Statistics compared to that of other sequenced *Aspergillus* Fungi**

| Genome specifics           |                    | Length      | Number of | N50 (bp)         | Protein-coding | GC content (%) | Gene density (1 gene every n bp) |
|----------------------------|--------------------|-------------|-----------|------------------|----------------|----------------|----------------------------------|
| Genome name                |                    | (Mp)        | Scaffolds |                  |                |                |                                  |
| <i>A. clavatus</i>         | NRRL 1             | 27.85       | 143       | 2,493,640        | 9125           | 49.2           | 2940                             |
| <b><i>A. cristatus</i></b> | <b>CGMCC 7.193</b> | <b>27.9</b> | <b>68</b> | <b>2,308,221</b> | <b>10136</b>   | <b>49.7</b>    | <b>2980</b>                      |
| <i>A. flavus</i>           | NRRL3357           | 39.91       | 331       | 2,388,123        | 13485          | 48.4           | 2959                             |
| <i>A. fumigatus</i>        | Af293              | 29.42       | 19        | 2,460,113        | 9969           | 49.8           | 2938                             |
| <i>A. kawachii</i>         | IFO4308            | 36.88       | 318       | 897,000          | 11488          | 49             | 3210                             |
| <i>A. nidulans</i>         | FGSC A4            | 30.06       | 89        | 2,440,000        | 9541           | 50.4           | 3151                             |
| <i>A. niger</i>            | CBS 513.88         | 35.74       | 20        | 2,525,243        | 11408          | 50.4           | 3133                             |
| <i>A. oryzae</i>           | 3.042              | 36.54       | 225       | 395,582          | 11397          | 48.3           | 3206                             |
| <i>A. parasiticus</i>      | SU-1               | 39.47       | 753       | 140,138          | 8645           | 48.1           | 4566                             |
| <i>A. rambellii</i>        | SRRC1468           | 26.45       | 4177      | 37,599           | 7761           | 45.8           | 3408                             |
| <i>A. ruber</i>            | CBS 135680         | 26.21       | 110       | 623,674          | 10076          | 48.8           | 2601                             |
| <i>A. sojae</i>            | NBRC 4239          | 39.5        | 65        | 2,061,651        | 13033          | 48.1           | 3031                             |
| <i>A. terreus</i>          | NIH 2624           | 29.23       | 27        | 1,912,493        | 10551          | 52.9           | 2770                             |
| <i>N. fischeri</i>         | NRRL 181           | 32.54       | 438       | 2,929,192        | 10729          | 49.4           | 3033                             |

The data is from the genomic data published online (<http://www.ncbi.nlm.nih.gov>).

**Table S2 Genes used for Phylogenetic Analysis**

| <b>Gene number</b> | <b>Function description</b>                                   |
|--------------------|---------------------------------------------------------------|
| SI65_00047         | UDP-Glycosyltransferase/glycogen_phosphorylase                |
| SI65_00048         | Cation_efflux_protein                                         |
| SI65_00082         | DNA_topoisomerase                                             |
| SI65_00103         | Ribosome_maturation_protein_SBDS                              |
| SI65_00105         | Ribosomal_protein_S13                                         |
| SI65_00135         | Ubiquitin                                                     |
| SI65_00136         | Cleavage/polyadenylation_specificity_factor                   |
| SI65_00140         | U3_small_nucleolar_RNA-associated_protein_10                  |
| SI65_00217         | TFIIH_p62_subunit                                             |
| SI65_00241         | Uncharacterised_protein_family,_ATP_binding                   |
| SI65_00249         | Cytoskeleton-associated_protein                               |
| SI65_00250         | transition_metal_ion_binding                                  |
| SI65_00252         | Mitochondrial_import_inner_membrane_translocase_subunit_Tim54 |
| SI65_00253         | NARP1                                                         |
| SI65_00257         | Iron_hydrogenase,_large_subunit,_C-terminal                   |
| SI65_00259         | Glycosyl_transferase,_family_3                                |
| SI65_00265         | Vacuolar_protein_sorting-associated_protein_26                |
| SI65_00266         | Uncharacterized_conserved_protein                             |
| SI65_00267         | Ubiquitin-conjugating_enzyme,_E2                              |
| SI65_00269         | RWD_domain                                                    |
| SI65_00272         | Putative_RNA_methylase                                        |
| SI65_00275         | Ribosomal_Proteins_L2,_RNA_binding_domain                     |
| SI65_00283         | Ribonuclease_II/R                                             |
| SI65_00290         | Mitochondrial_substrate/solute_carrier                        |
| SI65_00296         | Cell_differentiation,_Rcd1-like                               |
| SI65_00299         | GINS_complex                                                  |
| SI65_00300         | Sulphate_transporter                                          |
| SI65_00303         | Asparagine_synthase                                           |
| SI65_00304         | Vacuolar_sorting_protein_9                                    |
| SI65_00314         | ATP-grasp_fold,_ATP-dependent_carboxylate-amine_ligase-type   |
| SI65_00318         | Regulator_of_G_protein_signalling                             |
| SI65_00328         | Leucine-rich_repeat Endonuclease                              |
| SI65_00333         | ribosome_biogenesis                                           |
| SI65_00335         | Class_II_aldolase                                             |
| SI65_00340         | GPI_mannosyltransferase                                       |
| SI65_00344         | Monooxygenase,_FAD-binding                                    |
| SI65_00348         | Proprotein_convertase                                         |
| SI65_00353         | SNARE_associated_Golgi_protein                                |
| SI65_00389         | ORMDL                                                         |
| SI65_00404         | Ribosomal_protein_S24                                         |

---

|            |                                                                     |
|------------|---------------------------------------------------------------------|
| SI65_00416 | Ovarian_tumour,_otubain                                             |
| SI65_00423 | CDP-alcohol_phosphatidyltransferase                                 |
| SI65_00431 | Protein_of_unknown_function_DUF2370                                 |
| SI65_00440 | WD40_repeat,_subgroup                                               |
| SI65_00442 | Autophagy-related_protein_9                                         |
| SI65_00466 | Conserved_oligomeric_complex_COG6                                   |
| SI65_00478 | Aminoacyl-tRNA_synthetase                                           |
| SI65_00483 | Anthranilate_synthase_component_I                                   |
| SI65_00497 | Domain_of_unknown_function_DUF2427                                  |
| SI65_00503 | Gaa1-like,_GPI_transamidase_component                               |
| SI65_00504 | Proteasome_component_(PCI)_domain                                   |
| SI65_00513 | HEAT Protein_of_unknown_function_DUF3434                            |
| SI65_00522 | Armadillo-type_fold                                                 |
| SI65_00531 | HAD-like_domain                                                     |
| SI65_00534 | Transcription_factor_TFIIE_beta_subunit,_DNA-binding_domain         |
| SI65_00535 | 3,4-dihydroxy-2-butanone_4-phosphate_synthase,_RibB                 |
| SI65_00541 | Autophagy-related,_C-terminal                                       |
| SI65_00552 | Fructose-1,6-bisphosphatase_class_1                                 |
| SI65_00570 | CDC24_calponin                                                      |
| SI65_00575 | NAD(P)-binding_Rossmann-fold_domains                                |
| SI65_00578 | ATPase                                                              |
| SI65_00581 | Vacuolar_protein_sorting-associated_protein                         |
| SI65_00595 | intrinsic_to_membrane                                               |
| SI65_00622 | Serine/threonine-protein_kinase-like_domain                         |
| SI65_00625 | NGP1                                                                |
| SI65_00638 | transferase_activity                                                |
| SI65_00646 | GPI_mannosyltransferase                                             |
| SI65_00647 | Aminotransferase_class-III                                          |
| SI65_00706 | Chaperonin_Cpn60/TCP-1                                              |
| SI65_00707 | Ribosomal_protein_L7/L12,_C-terminal                                |
| SI65_00712 | YEATS                                                               |
| SI65_00729 | Domain_of_unknown_function_DUF2404                                  |
| SI65_00737 | Delayed-early_response_protein/equilibrative_nucleoside_transporter |
| SI65_00742 | Cdc37,_C-terminal // Cdc37,_N-terminal // Cdc37,_Hsp90_binding      |
| SI65_00743 | Clathrin_light_chain                                                |
| SI65_00758 | Homeobox                                                            |
| SI65_00763 | Signal_transduction_histidine_kinase,_phosphotransfer_(Hpt)_domain  |
| SI65_00770 | Prenyltransferase/squalene_oxidase                                  |
| SI65_00787 | SART-1_protein                                                      |
| SI65_00788 | Peptidyl-tRNA_hydrolase,_PTH2                                       |
| SI65_00794 | Pyridoxal_phosphate-dependent_decarboxylase                         |
| SI65_00796 | Exocyst_complex_component_Sec6                                      |
| SI65_00798 | Frataxin-like                                                       |
| SI65_00806 | Protein_prenyltransferase,_alpha_subunit                            |

---

---

|            |                                                                 |
|------------|-----------------------------------------------------------------|
| SI65_00823 | Ribosomal_protein_S6e                                           |
| SI65_00827 | 3-oxo-5-alpha-steroid_4-dehydrogenase,_C-terminal               |
| SI65_00831 | Ribosomal_protein_L28                                           |
| SI65_00836 | FeS_cluster_biogenesis                                          |
| SI65_00844 | Snf7                                                            |
| SI65_00864 | MgsA_AAA+_ATPase                                                |
| SI65_00865 | Aminotransferase,_class_I/classII                               |
| SI65_00877 | Cdk-activating_kinase_assembly_factor_MAT1,_centre              |
| SI65_00879 | Aldose_1-epimerase                                              |
| SI65_00891 | Proteasome/cyclosome,_regulatory_subunit                        |
| SI65_00897 | WD40_repeat,_subgroup                                           |
| SI65_00914 | Ribophorin_II                                                   |
| SI65_00958 | tRNA_synthetase                                                 |
| SI65_00959 | HEAT                                                            |
| SI65_00993 | F-box_domain,_cyclin-like                                       |
| SI65_01023 | Lumazine-binding_protein                                        |
| SI65_01026 | Alpha-D-phosphohexomutase,_alpha/beta/alpha_domain_I            |
| SI65_01031 | ATPase,_AAA-type,_core                                          |
| SI65_01040 | Golgi_phosphoprotein_3                                          |
| SI65_01048 | Ribosomal_protein_S2                                            |
| SI65_01066 | GAT                                                             |
| SI65_01074 | Ribosomal_protein_S26e                                          |
| SI65_01076 | HEAT // 26S_proteasome_non-ATPase_regulatory_subunit_5          |
| SI65_01080 | Uncharacterised_protein_family_UPF0662                          |
| SI65_01083 | Basic_helix-loop-helix,_Nulp1-type                              |
| SI65_01087 | Glycosyl_transferase,_family_1                                  |
| SI65_01154 | Domain_of_unknown_function_DUF2431                              |
| SI65_01156 | Pseudouridine_synthase_II                                       |
| SI65_01159 | eRF1_domain_3 // eRF1_domain_1/Pelota-like // eRF1_domain_2     |
| SI65_01161 | Ribosomal_protein_L25                                           |
| SI65_01165 | uridylate_kinase                                                |
| SI65_01172 | D-isomer_specific_2-hydroxyacid_dehydrogenase,_catalytic_domain |
| SI65_01180 | FACT_complex_subunit_Spt16p/Cdc68p                              |
| SI65_01188 | Uncharacterised_protein_family_UPF0061                          |
| SI65_01195 | Ribonuclease_HII/HIII                                           |
| SI65_01196 | Mif2                                                            |
| SI65_01198 | Methyltransferase_type_11                                       |
| SI65_01202 | Mov34/MPN/PAD-1                                                 |
| SI65_01208 | Coproporphyrinogen_III_oxidase,_aerobic                         |
| SI65_01209 | Light_chain_3_(LC3)                                             |
| SI65_01210 | Mitochondrial_substrate/solute_carrier                          |
| SI65_01216 | SNARE_interactions_in_vesicular_transport                       |
| SI65_01218 | Glutamate_synthase                                              |
| SI65_01224 | Protein_of_unknown_function_DUF3639                             |

---

---

|            |                                                        |    |
|------------|--------------------------------------------------------|----|
| SI65_01244 | Peptidase_C19,_ubiquitin_carboxyl-terminal_hydrolase_2 |    |
| SI65_01245 | Zinc_finger,_C3HC4_RING-type                           |    |
| SI65_01264 | Phosphatidate_cytidylyltransferase                     |    |
| SI65_01266 | RNA-binding_S4                                         |    |
| SI65_01283 | Diphthamide_synthesis,_DPH1/DHP2                       |    |
| SI65_01301 | WD40_repeat,_subgroup                                  |    |
| SI65_01312 | Iso_dh                                                 |    |
| SI65_01317 | Pyruvate_kinase                                        |    |
| SI65_01364 | UbiA_prenyltransferase_family                          |    |
| SI65_01366 | Aminoacyl-tRNA_synthetase,_class_II_(D/K/N)            |    |
| SI65_01370 | Aminoacyl-tRNA_synthetase,_class_Ib                    |    |
| SI65_01414 | Domain_of_unknown_function_DUF3535                     |    |
| SI65_01429 | Inosine/uridine-preferring_nucleoside_hydrolase_domain |    |
| SI65_01436 | UAA_transporter                                        |    |
| SI65_01455 | Importin-beta,_N-terminal                              |    |
| SI65_01483 | Protein_of_unknown_function_DUF726                     |    |
| SI65_01513 | Rab-GAP/TBC_domain                                     |    |
| SI65_01517 | Vps52/Sac2                                             |    |
| SI65_01531 | Ribosomal_protein_L27                                  |    |
| SI65_01573 | Histone_acetyltransferases_subunit_3                   |    |
| SI65_01574 | Nitrogen_permease_regulator_2                          |    |
| SI65_01579 | Ribosomal_protein_L18a/LX                              |    |
| SI65_01596 | Leucine-rich_repeat                                    |    |
| SI65_01620 | TPR-like                                               |    |
| SI65_01621 | Sterile_alpha_motif,_type_2                            |    |
| SI65_01626 | Uroporphyrinogen_decarboxylase_(URO-D)                 |    |
| SI65_01627 | WD40_repeat,_subgroup                                  |    |
| SI65_01628 | Ribosomal_protein_60S                                  |    |
| SI65_01630 | Vps53-like,_N-terminal                                 |    |
| SI65_01631 | TAP, Nuclear_transport_factor_2                        |    |
| SI65_01632 | Domain_of_unknown_function_DUF1692                     |    |
| SI65_01636 | RNA_polymerase                                         |    |
| SI65_01652 | sorting_protein_VPS8                                   |    |
| SI65_01657 | Domain_of_unknown_function_DUF1726                     |    |
| SI65_01668 | Ribosomal_protein_L11,_C-terminal_domain               | // |
|            | Ribosomal_protein_L11,_N-terminal                      |    |
| SI65_01670 | DNA_primase,_large_subunit,_eukaryotic/archaeal        |    |
| SI65_01672 | Staphylococcal_nuclease_(SNase-like)                   |    |
| SI65_01673 | Mitochondrial_substrate/solute_carrier                 |    |
| SI65_01674 | Peptidase_C2,_calpain,_catalytic_domain                |    |
| SI65_01678 | DNA_topoisomerase_I,_DNA_binding,_eukaryotic-type      |    |
| SI65_01679 | ATPase,_F1_complex,_gamma_subunit                      |    |
| SI65_01700 | DeoxyUTP_pyrophosphatase                               |    |
| SI65_01705 | Rab-GAP/TBC_domain                                     |    |

---

---

|            |                                                               |
|------------|---------------------------------------------------------------|
| SI65_01712 | Initiation_factor_eIF-4_gamma,_MA3                            |
| SI65_01719 | WD40_repeat                                                   |
| SI65_01720 | alpha/beta-Hydrolases                                         |
| SI65_01722 | NPL4,_zinc-binding_putative // NPL4                           |
| SI65_01724 | Zinc_finger,_CCCH-type                                        |
| SI65_01755 | Ribosomal_protein_S24e                                        |
| SI65_01761 | adenyl_ribonucleotide_binding                                 |
| SI65_01770 | Uncharacterized conserved protein                             |
| SI65_01775 | Clathrin // Clathrin,_heavy_chain,_propeller_repeat           |
| SI65_01819 | Aminoacyl-tRNA_synthetase,_class_I_(M)                        |
| SI65_01821 | Protein_prenyltransferase,_alpha_subunit                      |
| SI65_01828 | Hypoxia_induced_protein,_domain                               |
| SI65_01829 | Pyridoxal_phosphate-dependent_enzyme,_beta_subunit            |
| SI65_01866 | Proteasome,_subunit_alpha/beta                                |
| SI65_01881 | WD40_repeat,_subgroup                                         |
| SI65_01883 | Peptidase_C19,_ubiquitin_carboxyl-terminal_hydrolase_2        |
| SI65_01885 | WD40_repeat,_subgroup // Small-subunit_processome,_Utp13      |
| SI65_01889 | Protein_synthesis_factor,_GTP-binding                         |
| SI65_01988 | Squalene/phytoene_synthase                                    |
| SI65_01992 | Peptidase_M48                                                 |
| SI65_01994 | WD40_repeat,_subgroup                                         |
| SI65_02019 | WD40_repeat,_subgroup                                         |
| SI65_02027 | UPF0103/Mediator_of_ErbB2-driven_cell_motility_(Memo-related) |
| SI65_02041 | Kinetochores_Spc7                                             |
| SI65_02066 | DNA_polymerase_alpha/epsilon,_subunit_B                       |
| SI65_02082 | Mitochondrial_inner_membrane_protein_Mitofilin                |
| SI65_02086 | Myristoyl-CoA:protein_N-myristoyltransferase                  |
| SI65_02099 | Ribosomal_protein_L5                                          |
| SI65_02115 | WD40_repeat,_subgroup                                         |
| SI65_02124 | UTP--glucose-1-phosphate_uridylyltransferase                  |
| SI65_02128 | Nicotinamide_N-methyltransferase,_putative                    |
| SI65_02153 | tRNA-dihydrouridine_synthase                                  |
| SI65_02193 | Ribulose-phosphate_3-epimerase                                |
| SI65_02202 | Ssl1-like                                                     |
| SI65_02210 | Serine/threonine-protein_kinase-like_domain                   |
| SI65_02229 | TAFII55_protein,_conserved_region                             |
| SI65_02234 | Oxoglutarate/iron-dependent_oxygenase                         |
| SI65_02241 | Type_I_phosphodiesterase                                      |
| SI65_02246 | CCAAT-binding_transcription_factor,_subunit_B                 |
| SI65_02329 | Histone_deacetylase_interacting // Paired_amphipathic_helix   |
| SI65_02330 | WD40_repeat,_subgroup                                         |
| SI65_02336 | Transcription_initiation_factor_IIF,_beta_subunit             |
| SI65_02341 | ATPase,_F0_complex,_subunit_B,_mitochondrial                  |
| SI65_02342 | CCAAT-binding_factor                                          |

---

---

|            |                                                               |
|------------|---------------------------------------------------------------|
| SI65_02347 | MMS19_N                                                       |
| SI65_02349 | Protein_of_unknown_function_DUF106,_transmembrane             |
| SI65_02351 | Tetrahydrofolate_dehydrogenase/cyclohydrolase                 |
| SI65_02352 | ATPase,_F1/V1/A1_complex,_alpha/beta_subunit                  |
| SI65_02362 | Glycine_cleavage_system_P-protein,_N-terminal                 |
| SI65_02405 | EAP30                                                         |
| SI65_02427 | PHP,_C-terminal                                               |
| SI65_02433 | Vacuolar_protein_sorting_protein,_Vps36 // EAP30              |
| SI65_02435 | Phox_homologous_domain // Phox/Bem1p // Src_homology-3_domain |
| SI65_02458 | ATPase,_AFG1-like                                             |
| SI65_02463 | Alanine_racemase,_N-terminal                                  |
| SI65_02472 | Transcription_factor_Tfb2                                     |
| SI65_02474 | Timeless_protein // Timeless_C-terminal                       |
| SI65_02477 | Actin-like                                                    |
| SI65_02491 | ATP-citrate_lyase/succinyl-CoA_ligase                         |
| SI65_02503 | Bacterial_surface_antigen_(D15)                               |
| SI65_02509 | Sodium/calcium_exchanger_membrane_region                      |
| SI65_02510 | Carbohydrate_kinase,_FGGY,_C-terminal                         |
| SI65_02515 | Nucleoporin_interacting_component_Nup93/Nic96                 |
| SI65_02536 | Exportin-1/Importin-beta-like                                 |
| SI65_02552 | WD40_repeat,_subgroup                                         |
| SI65_02553 | Peptidase_S10,_serine_carboxypeptidase                        |
| SI65_02556 | ICE2                                                          |
| SI65_02557 | Metal-dependent_protein_hydrolase                             |
| SI65_02560 | Aminoacyl-tRNA_synthetase,_class_I_(M)                        |
| SI65_02563 | Sorting_nexin                                                 |
| SI65_02564 | Phospholipid_methyltransferase                                |
| SI65_02577 | BOP1,_N-terminal // WD40_repeat,_subgroup                     |
| SI65_02587 | Cytidylyltransferase                                          |
| SI65_02589 | Digestive_organ_expansion_factor,_predicted                   |
| SI65_02597 | Ribosomal_protein_L17                                         |
| SI65_02600 | Ribosomal_protein_S12/S23                                     |
| SI65_02601 | Initiation_factor_2B-related                                  |
| SI65_02603 | Aminotransferase,_class_V/Cysteine_desulfurase                |
| SI65_02604 | Metallo-dependent_phosphatases                                |
| SI65_02613 | WD40_repeat,_subgroup                                         |
| SI65_02619 | Serine/threonine-protein_kinase-like_domain                   |
| SI65_02620 | LsmAD_domain                                                  |
| SI65_02626 | RNA_ligase,_T4_RnlA-like                                      |
| SI65_02641 | Nitrogen_permease_regulator_3                                 |
| SI65_02654 | Membrane_transporter,_Tim44-related/Ribosomal_protein_L45     |
| SI65_02676 | S-adenosyl-L-homocysteine_hydrolase,_NAD_binding              |
| SI65_02679 | NOSIC                                                         |
| SI65_02680 | RNA-processing_protein,_HAT_helix                             |

---

---

|            |                                                |
|------------|------------------------------------------------|
| SI65_02696 | Phosphoglycerate_kinase                        |
| SI65_02705 | CPL                                            |
| SI65_02711 | ATPase_assembly_factor_ATP10,_mitochondria     |
| SI65_02712 | V-SNARE_C                                      |
| SI65_02713 | Ribosomal_protein_L29                          |
| SI65_02738 | Glycosyl_transferase,_family_1                 |
| SI65_02739 | DNA/RNA_helicase                               |
| SI65_02745 | Fatty_acid_hydroxylase                         |
| SI65_02746 | Translationally_controlled_tumour_protein      |
| SI65_02751 | Beta-Casp_domain                               |
| SI65_02755 | Aminoacyl-tRNA_synthetase,_class_Ib            |
| SI65_02767 | Pseudouridine_synthase,_TruD                   |
| SI65_02775 | Trimeric_LpxA-like                             |
| SI65_02781 | Craniofacial_development_protein_1             |
| SI65_02785 | Amidohydrolase_2                               |
| SI65_02791 | ATPase,_V1_complex,_subunit_C                  |
| SI65_02795 | Glycine_cleavage_T-protein                     |
| SI65_02802 | WD40_repeat,_subgroup                          |
| SI65_02805 | ATPase,_V1_complex,_subunit_H                  |
| SI65_02810 | S-adenosylmethionine_synthetase,_C-terminal    |
| SI65_02825 | Nucleolar,_Nop52                               |
| SI65_02827 | Clathrin/coatomer_adaptor,_adaptin-like        |
| SI65_02880 | Glutamate-cysteine_ligase_catalytic_subunit    |
| SI65_02912 | ATPase,_AAA-type,_VAT                          |
| SI65_02915 | Mo25-like                                      |
| SI65_02919 | Ankyrin_repeat                                 |
| SI65_02938 | Dual_specificity_phosphatase,_catalytic_domain |
| SI65_02952 | Cyclin,_N-terminal                             |
| SI65_02965 | Phox_homologous_domain                         |
| SI65_02968 | THO_complex,_subunitTHOC2                      |
| SI65_02975 | Serine/threonine-protein_kinase-like_domain    |
| SI65_02976 | RNA_recognition_motif_domain                   |
| SI65_02978 | Carbamoyl-phosphate_synthase,_small_subunit    |
| SI65_02981 | PIG-X                                          |
| SI65_03006 | DNA_repair_protein_rad10                       |
| SI65_03017 | Serine/threonine-protein_kinase-like_domain    |
| SI65_03023 | WD40_repeat,_subgroup                          |
| SI65_03034 | Domain_of_unknown_function_DUF1279             |
| SI65_03035 | Ribosomal_protein_L3                           |
| SI65_03041 | PRELI/MSF1                                     |
| SI65_03046 | Mpp10_protein                                  |
| SI65_03049 | Nucleoporin,_Nup133/Nup155-like                |
| SI65_03058 | Glutamine_amidotransferase,_class-II           |
| SI65_03064 | methyltransferase,_Williams-Beuren_syndrome    |

---

---

|            |                                                                |
|------------|----------------------------------------------------------------|
| SI65_03067 | Mitochondrial_distribution_and_morphology_protein_family_31/32 |
| SI65_03068 | K_Homology,_type_1,_subgroup                                   |
| SI65_03069 | Proteasome,_subunit_alpha/beta                                 |
| SI65_03071 | Proteasome,_subunit_alpha/beta                                 |
| SI65_03077 | WD40_repeat,_subgroup                                          |
| SI65_03084 | Eukaryotic_phosphomannomutase                                  |
| SI65_03094 | Sybindin-like_protein                                          |
| SI65_03098 | Translation_initiation_factor_IF6                              |
| SI65_03102 | Ubiquitin                                                      |
| SI65_03108 | Domain_of_unknown_function_DUF2427                             |
| SI65_03109 | UBA/THIF-type_NAD/FAD_binding_fold                             |
| SI65_03112 | ATP-citrate_lyase                                              |
| SI65_03113 | GCN5-related_N-acetyltransferase_(GNAT)_domain                 |
| SI65_03114 | Histidine_biosynthesis                                         |
| SI65_03116 | Zinc_finger,_C2H2-type                                         |
| SI65_03120 | Aminotransferase                                               |
| SI65_03121 | RNA_polymerase_I_associated_factor,_A49-like                   |
| SI65_03124 | Peroxin-3                                                      |
| SI65_03130 | Ribosomal_Proteins_L2,_RNA_binding_domain                      |
| SI65_03133 | Carbohydrate/purine_kinase                                     |
| SI65_03138 | Ribosomal_protein_L5                                           |
| SI65_03141 | Clathrin                                                       |
| SI65_03144 | Sad1/UNC-like                                                  |
| SI65_03149 | GTP-binding_domain,_HSR1-related                               |
| SI65_03150 | Low_temperature_viability_protein                              |
| SI65_03151 | Phospholipase_D/nuclease                                       |
| SI65_03200 | Mur_ligase,_central                                            |
| SI65_03207 | HhH-GPD_domain                                                 |
| SI65_03216 | Asparagine_synthase                                            |
| SI65_03223 | Rad52/22_double-strand_break_repair_protein                    |
| SI65_03225 | Amino_acid_transporter,_transmembrane                          |
| SI65_03240 | Cytochrome_c/c1_haem-lyase                                     |
| SI65_03241 | GHMP_kinase                                                    |
| SI65_03242 | IKI3                                                           |
| SI65_03247 | Aspartate/ornithine_carbamoyltransferase                       |
| SI65_03249 | Acetolactate_synthase,_small_subunit                           |
| SI65_03255 | Mur_ligase,_central                                            |
| SI65_03346 | organellar_small_ribosomal_subunit                             |
| SI65_03347 | Signal_recognition_particle_receptor,_alpha_subunit            |
| SI65_03349 | Hrf1                                                           |
| SI65_03352 | ATPase,_F0_complex,_subunit_D,_mitochondrial                   |
| SI65_03354 | Aldehyde_dehydrogenase_domain                                  |
| SI65_03359 | Glutamine_amidotransferase,_class-II                           |
| SI65_03382 | Protein_of_unknown_function_DUF3548                            |

---

---

|            |                                                      |
|------------|------------------------------------------------------|
| SI65_03383 | Protein_of_unknown_function_DUF3402                  |
| SI65_03384 | Phosphatidic_acid_phosphatase_type_2                 |
| SI65_03397 | RWD_domain                                           |
| SI65_03398 | Armadillo-type_fold                                  |
| SI65_03403 | D123                                                 |
| SI65_03408 | CAS/CSE                                              |
| SI65_03421 | DNA/RNA_helicase                                     |
| SI65_03434 | CDP-alcohol_phosphatidyltransferase                  |
| SI65_03435 | Glucose-inhibited_division_protein_A-related         |
| SI65_03436 | Acireductone_dioxygenase_ARD_family                  |
| SI65_03439 | Homeodomain-like                                     |
| SI65_03440 | E3_ubiquitin_ligase                                  |
| SI65_03442 | ABC-1                                                |
| SI65_03446 | Peptidase_M22,_glycoprotease                         |
| SI65_03447 | SET_domain                                           |
| SI65_03448 | Enhancer_of_polycomb-like,_N-terminal                |
| SI65_03451 | Ribosomal_protein_S9                                 |
| SI65_03454 | Protein_of_unknown_function_DUF947                   |
| SI65_03466 | Imidazoleglycerol-phosphate_dehydratase              |
| SI65_03469 | Mitochondrial_protein_Pet127                         |
| SI65_03472 | Nucleotide_exchange_factor_Fes1                      |
| SI65_03473 | Uncharacterised_protein_family_UPF0220               |
| SI65_03481 | Transport_protein_Trsl20                             |
| SI65_03484 | Membrane_bound_O-acyl_transferase,_MBOAT             |
| SI65_03486 | Abortive_infection_protein                           |
| SI65_03498 | Aconitase_A                                          |
| SI65_03506 | Uncharacterised_protein_family_UPF0363               |
| SI65_03508 | tRNA_isopentenyltransferase                          |
| SI65_03509 | P-loop_containing_nucleoside_triphosphate_hydrolases |
| SI65_03513 | Porin,_eukaryotic_type                               |
| SI65_03515 | MIF4G-like,_type_2                                   |
| SI65_03531 | Exocyst_complex_subunit_Sec15-like                   |
| SI65_03554 | TIP41-like_protein                                   |
| SI65_03561 | Pyridoxal_phosphate-dependent_enzyme                 |
| SI65_03568 | Serine/threonine-protein_kinase-like_domain          |
| SI65_03623 | RNA-binding_S4                                       |
| SI65_03627 | Orotidine_5'-phosphate_decarboxylase_domain          |
| SI65_03631 | WD40_repeat,_subgroup                                |
| SI65_03636 | TFIIE_alpha                                          |
| SI65_03638 | Domain_of_unknown_function_DUF1709                   |
| SI65_03645 | Peptidyl-prolyl_cis-trans_isomerase                  |
| SI65_03649 | RNA_recognition_motif_domain                         |
| SI65_03653 | Phospholipid/glycerol_acyltransferase                |
| SI65_03660 | Zinc_finger,_C3HC4_RING-type                         |

---

---

|            |                                                      |
|------------|------------------------------------------------------|
| SI65_03662 | DNA/RNA_non-specific_endonuclease                    |
| SI65_03668 | Carbamoyl-phosphate_synthetase                       |
| SI65_03690 | Exoribonuclease,_phosphorolytic_domain_2             |
| SI65_03693 | Dihydrofolate_reductase_domain                       |
| SI65_03713 | Ankyrin_repeat-containing_domain                     |
| SI65_03727 | DNA/RNA_helicase,_DEAD/DEAH_box_type                 |
| SI65_03739 | RIO-like_kinase                                      |
| SI65_03742 | F-box_domain,_cyclin-like                            |
| SI65_03753 | Mitochondrial_inner_membrane_translocase_complex     |
| SI65_03773 | WD40_repeat,_subgroup                                |
| SI65_03805 | UBA/THIF-type_NAD/FAD_binding_fold                   |
| SI65_03814 | Nse4                                                 |
| SI65_03815 | Phosphatidylinositol_3-/4-kinase                     |
| SI65_03841 | Oligosaccharyl_transferase_complex,_subunit_Wbp1     |
| SI65_03845 | DNA_polymerase                                       |
| SI65_03854 | WD40_repeat,_subgroup                                |
| SI65_03872 | Domain_of_unknown_function_DUF1620                   |
| SI65_03877 | BEACH_domain                                         |
| SI65_03887 | Inhibitor_of_apoptosis-promoting_Bax1-related        |
| SI65_03912 | Histone_H3-K56_acetyltransferase,_RTT109             |
| SI65_03932 | Glycoside_hydrolase,_family_31                       |
| SI65_03933 | Nucleoside_diphosphate_kinase                        |
| SI65_03941 | PLU-1-like                                           |
| SI65_03950 | Zinc_ribbon,_NADH_pyrophosphatase                    |
| SI65_03951 | Nitrilase                                            |
| SI65_03954 | Helicase                                             |
| SI65_03962 | GOLD                                                 |
| SI65_03976 | WD40_repeat,_subgroup                                |
| SI65_03980 | SKI-interacting_protein_SKIP                         |
| SI65_03983 | Ribosomal_protein_L4/L1e                             |
| SI65_04021 | Splicing_factor_3B_subunit_1                         |
| SI65_04022 | Sec1-like_protein                                    |
| SI65_04026 | Telomere_length_regulation_protein,_conserved_domain |
| SI65_04062 | Ribonuclease_P                                       |
| SI65_04070 | Ubiquitin                                            |
| SI65_04072 | WD40_repeat,_subgroup                                |
| SI65_04080 | BRCT                                                 |
| SI65_04083 | Restriction_endonuclease                             |
| SI65_04089 | AdoMet-dependent_methyltransferase,_predicted        |
| SI65_04093 | DNA/RNA_helicase                                     |
| SI65_04097 | Serine/threonine-protein_kinase-like_domain          |
| SI65_04100 | P-loop_containing_nucleoside_triphosphate_hydrolases |
| SI65_04111 | Phospholipase/carboxylesterase                       |
| SI65_04159 | Chaperonin_Cpn60                                     |

---

---

|            |                                                                 |
|------------|-----------------------------------------------------------------|
| SI65_04187 | Mitochondrial_substrater                                        |
| SI65_04188 | F-box_domain,_Skp2-like                                         |
| SI65_04194 | AP_complex                                                      |
| SI65_04196 | SUA5                                                            |
| SI65_04200 | Hydroxyethylthiazole_kinase                                     |
| SI65_04203 | eIF4-gamma/eIF5/eIF2-epsilon                                    |
| SI65_04206 | Armadillo-type_fold                                             |
| SI65_04240 | Cytochrome_c_oxidase,_subunit_Va                                |
| SI65_04243 | AIR_synthase-related_protein                                    |
| SI65_04252 | AMP-dependent_synthetase/ligase                                 |
| SI65_04254 | CWC16_protein                                                   |
| SI65_04255 | Phosphatidylinositol_3-/4-kinase                                |
| SI65_04275 | Polyprenyl_synthetase                                           |
| SI65_04278 | Zinc_finger,_double-stranded_RNA_binding                        |
| SI65_04280 | WD40_repeat,_subgroup                                           |
| SI65_04282 | ATPase,_F1/V1/A1_complex,_alpha/beta_subunit                    |
| SI65_04303 | Armadillo-type_fold                                             |
| SI65_04311 | Dephospho-CoA_kinase                                            |
| SI65_04338 | Arb2_domain // Histone_deacetylase_domain                       |
| SI65_04340 | Inorganic_phosphate_transporter_Pho88                           |
| SI65_04343 | Single-stranded_nucleic_acid_binding_R3H                        |
| SI65_04367 | Zinc_finger,_ZPR1-type                                          |
| SI65_04369 | Metallo-dependent_phosphatase                                   |
| SI65_04372 | Leucine-rich_repeat                                             |
| SI65_04374 | Clathrin // VPS11_C                                             |
| SI65_04407 | Ras                                                             |
| SI65_04408 | WD40_repeat,_subgroup                                           |
| SI65_04421 | Sterile_alpha_motif,_type_2                                     |
| SI65_04424 | Domain_of_unknown_function_DUF298                               |
| SI65_04444 | Mitochondrial_substrate/solute_carrier                          |
| SI65_04457 | SNF5/SMARCB1/INI1                                               |
| SI65_04462 | Peptidase_M24,_structural_domain                                |
| SI65_04465 | Glycosyl_transferase,_ALG6/ALG8                                 |
| SI65_04467 | Mitochondrial_substrate/solute_carrier                          |
| SI65_04469 | NMD3                                                            |
| SI65_04475 | Snf7                                                            |
| SI65_04478 | Poly_A_polymerase,_head_domain                                  |
| SI65_04485 | DNA-directed_DNA_polymerase,_family_B,_exonuclease_domain       |
| SI65_04512 | Oxidoreductase                                                  |
| SI65_04521 | Glutamyl/glutaminyl-tRNA_synthetase,_class_Ic,_catalytic_domain |
| SI65_04522 | Microtubule-associated_protein,_MAP65/ASE1-type                 |
| SI65_04548 | Histidine_triad_(HIT)_protein                                   |
| SI65_04552 | Importin-alpha-like,_importin-beta-binding_domain               |
| SI65_04553 | STAG                                                            |

---

---

|            |                                                                    |
|------------|--------------------------------------------------------------------|
| SI65_04557 | Ribosomal_protein_S1,_RNA-binding_domain                           |
| SI65_04560 | Aminoacyl-tRNA_synthetase                                          |
| SI65_04564 | N-methyltransferase_activity                                       |
| SI65_04572 | Importin-beta,_N-terminal                                          |
| SI65_04587 | Cyclin,_N-terminal                                                 |
| SI65_04588 | EF-hand                                                            |
| SI65_04621 | Patatin                                                            |
| SI65_04625 | Actin-like                                                         |
| SI65_04627 | YL1_nuclear,_C-terminal                                            |
| SI65_04654 | Serine/threonine-protein_kinase-like_domain                        |
| SI65_04656 | Bud13                                                              |
| SI65_04717 | Heat_shock_protein_DnaJ,_N-terminal                                |
| SI65_04719 | RNA_recognition_motif_domain                                       |
| SI65_04740 | Endoplasmic_reticulum_oxidoreductin_1                              |
| SI65_04763 | Leukotriene_A4_hydrolase                                           |
| SI65_04777 | RNase_P_subunit_p30                                                |
| SI65_04786 | DNA_mismatch_repair_protein_MutS                                   |
| SI65_04794 | Serine/threonine-protein_kinase-like_domain                        |
| SI65_04797 | RNA_3'-terminal_phosphate_cyclase_domain                           |
| SI65_04800 | Heat_shock_cognate_protein_B                                       |
| SI65_04801 | Pre-mRNA_processing_factor_4_(PRP4)-like                           |
| SI65_04802 | Protein_phosphatase_2C-like                                        |
| SI65_04820 | Oligosaccharyl_transferase,_STT3_subunit                           |
| SI65_04822 | Protein_of_unknown_function_DUF3453                                |
| SI65_04833 | Predicted_methyltransferase                                        |
| SI65_04839 | ATPase,_AAA-type,_core                                             |
| SI65_04840 | Sec62/63_complex,_subunit_Sec66                                    |
| SI65_04848 | Putative_Zn-finger_protein                                         |
| SI65_04863 | Cleavage/polyadenylation_specificity_factor,_A_subunit,_C-terminal |
| SI65_04887 | Ssl1-like                                                          |
| SI65_04901 | Mitochondrial_substrate/solute_carrier                             |
| SI65_04902 | Peptidase_M16                                                      |
| SI65_04903 | RNA_polymerase_III_subunit_RPC82-related,_helix-turn-helix         |
| SI65_04915 | CS_domain // SGS                                                   |
| SI65_04923 | Ribosomal_protein_L27                                              |
| SI65_04940 | Signal_recognition_particle,_SRP54_subunit,_M-domain               |
| SI65_04967 | SEP_domain                                                         |
| SI65_04969 | Membrane_insertion_protein,_OxaA/YidC                              |
| SI65_04975 | S-adenosylmethionine_decarboxylase                                 |
| SI65_04976 | TATA_box_binding_protein_associated_factor_(TAF)                   |
| SI65_04977 | Cellular_retinaldehyde-binding/triple_function                     |
| SI65_05004 | Gtr1/RagA_G_protein                                                |
| SI65_05010 | Exportin-1/Importin-beta-like                                      |
| SI65_05011 | Carbohydrate_kinase                                                |

---

---

|            |                                                     |
|------------|-----------------------------------------------------|
| SI65_05032 | Metallo-dependent_phosphatase                       |
| SI65_05034 | Mitochondrial_substrate/solute_carrier              |
| SI65_05037 | Peptidase_C50,_separase                             |
| SI65_05038 | Putative_esterase                                   |
| SI65_05039 | Ribosomal_protein_S15                               |
| SI65_05042 | 8-oxoguanine_DNA_glycosylase                        |
| SI65_05045 | Galactose_oxidase                                   |
| SI65_05047 | Structure-specific_recognition_protein              |
| SI65_05091 | Ketopantoate_reductase_ApbA/PanE                    |
| SI65_05100 | Helicase                                            |
| SI65_05101 | PGAP1-like                                          |
| SI65_05111 | TPR-like                                            |
| SI65_05116 | Metallo-dependent_phosphatase // Mre11,_DNA-binding |
| SI65_05120 | Protein_import_receptor_MAS20-related               |
| SI65_05121 | Vps51/Vps67                                         |
| SI65_05122 | ABC_transporter-like                                |
| SI65_05138 | NUDIX_hydrolase_domain                              |
| SI65_05142 | Serine/threonine-protein_kinase-like_domain         |
| SI65_05143 | Replication_protein_A                               |
| SI65_05149 | Phosphoadenosine_phosphosulphate_reductase          |
| SI65_05161 | Domain_of_unknown_function_DUF2183                  |
| SI65_05170 | Fry-like_conserved_proteins                         |
| SI65_05179 | Pre-mRNA_polyadenylation_factor_Fip1                |
| SI65_05187 | UBA/THIF-type_NAD/FAD_binding_fold                  |
| SI65_05188 | Ribose_5-phosphate_isomerase                        |
| SI65_05194 | tRNA_processing                                     |
| SI65_05219 | Aminoacyl-tRNA_synthetase                           |
| SI65_05222 | RAVE_protein_1                                      |
| SI65_05262 | Tetrapyrrole_methylase                              |
| SI65_05273 | DEAD2                                               |
| SI65_05274 | RNA_polymerase,_alpha_subunit                       |
| SI65_05275 | Pre-mRNA-splicing_factor_3                          |
| SI65_05277 | GPI_mannosyltransferase                             |
| SI65_05298 | RNA_polymerase                                      |
| SI65_05305 | Bacterial_Fmu_(Sun)/eukaryotic_nucleolar_NOL1/Nop2p |
| SI65_05310 | CASP,_C-terminal                                    |
| SI65_05317 | Serine/threonine-protein_kinase-like_domain         |
| SI65_05318 | UBX                                                 |
| SI65_05330 | Heat_shock_protein_70                               |
| SI65_05340 | D-arabinono-1,4-lactone_oxidase                     |
| SI65_05344 | Sec63_domain                                        |
| SI65_05349 | GWT1                                                |
| SI65_05357 | organelle_membrane                                  |
| SI65_05358 | B-cell_receptor-associated_31-like                  |

---

---

|            |                                                          |
|------------|----------------------------------------------------------|
| SI65_05359 | tRNA-dihydrouridine_synthase                             |
| SI65_05360 | C2H2_and_C2HC_zinc_fingers                               |
| SI65_05369 | WD40_repeat,_subgroup                                    |
| SI65_05371 | WD40_repeat,_subgroup                                    |
| SI65_05376 | Transcription_factor_TAFII-31                            |
| SI65_05378 | Small-subunit_processome,_Utp11                          |
| SI65_05379 | Phosphoribosyl-AMP_cyclohydrolase                        |
| SI65_05389 | SDA1                                                     |
| SI65_05390 | Ribosomal_protein_S7_domain                              |
| SI65_05432 | RNA_polymerase_II_subunit_A                              |
| SI65_05434 | Exoribonuclease,_phosphorolytic_domain_1                 |
| SI65_05440 | Src_homology-3_domain                                    |
| SI65_05483 | IMP_dehydrogenase/GMP_reductase                          |
| SI65_05486 | Phenylalanyl-tRNA_synthetase                             |
| SI65_05501 | Mov34/MPN/PAD-1                                          |
| SI65_05503 | Ribosomal_protein_L14b/L23e                              |
| SI65_05537 | PROCN                                                    |
| SI65_05539 | Cytochrome_c_oxidase,_subunit_Vb                         |
| SI65_05546 | eRF1_domain_3                                            |
| SI65_05553 | WD40_repeat,_subgroup                                    |
| SI65_05554 | WD40_repeat-like-containing_domain                       |
| SI65_05584 | rRNA-processing_protein_EFG1                             |
| SI65_05595 | DNA_topoisomerase,_type_IA                               |
| SI65_05603 | Ku70/Ku80,_N-terminal_alpha/beta                         |
| SI65_05604 | Coatomer,_gamma_subunit                                  |
| SI65_05610 | Phosducin                                                |
| SI65_05631 | WD40_repeat,_subgroup                                    |
| SI65_05633 | Exosomal_3'-5'_exoribonuclease_complex_subunit_Rrp40     |
| SI65_05649 | UDP-glucose:Glycoprotein_Glucosyltransferase             |
| SI65_05652 | Prefoldin_subunit                                        |
| SI65_05655 | phosphotransferase_activity                              |
| SI65_05678 | Programmed_cell_death_protein_2,_C-terminal              |
| SI65_05682 | DNA_polymerase_epsilon,_catalytic_subunit_A              |
| SI65_05685 | Chaperonin_Cpn60/TCP-1                                   |
| SI65_05694 | Aminoacyl-tRNA_synthetase,_class_II_(D/K/N)              |
| SI65_05696 | Beta-Casp_domain                                         |
| SI65_05697 | Frag1/DRAM/Sfk1                                          |
| SI65_05715 | U3_small_nucleolar_RNA-associated_protein_6              |
| SI65_05726 | Helicase/RNase_D_C-terminal,_HRDC_domain                 |
| SI65_05727 | Lecithin:cholesterol_acyltransferase                     |
| SI65_05733 | Phosphatidic_acid_phosphatase_type_2/haloperoxidase      |
| SI65_05759 | Cyclic_nucleotide-binding_domain                         |
| SI65_05761 | Electron_transfer_flavoprotein-ubiquinone_oxidoreductase |
| SI65_05780 | TATA-box_binding_protein                                 |

---

---

|            |                                                           |
|------------|-----------------------------------------------------------|
| SI65_05785 | Peroxisome_membrane_anchor_protein_Pex14p,_N-terminal     |
| SI65_05786 | CCR4-Not_complex_component,_Not1                          |
| SI65_05791 | Fps/Fes/Fer/CIP4_homology                                 |
| SI65_05800 | Zinc_finger,_Mcm10/DnaG-type                              |
| SI65_05808 | Vacuolar_protein_sorting-associated_protein_35            |
| SI65_05822 | Nuclear_transport_factor_2                                |
| SI65_05830 | Transcription_factor_TFIIB,_cyclin-related                |
| SI65_05849 | ARP2/3_complex_16kDa_subunit_(p16-Arc)                    |
| SI65_05860 | GSKIP/TIF31_domain                                        |
| SI65_05866 | Pex19_protein                                             |
| SI65_05869 | Bromodomain                                               |
| SI65_05871 | Suppressor_of_forked                                      |
| SI65_05872 | Lethal_giant_larvae_(Lgl)-like                            |
| SI65_05875 | THUMP                                                     |
| SI65_05877 | Polyprenyl_synthetase                                     |
| SI65_05886 | Armadillo-type_fold                                       |
| SI65_05900 | Clathrin                                                  |
| SI65_05908 | ArsA_ATPase                                               |
| SI65_05909 | ATPase,_AAA-type,_core                                    |
| SI65_05911 | Peptidase_A1                                              |
| SI65_05914 | NLI_interacting_factor                                    |
| SI65_05917 | Ureohydrolase                                             |
| SI65_05949 | Glutamyl-tRNA(Gln)_amidotransferase,_subunit_B/E          |
| SI65_05957 | Zinc_finger,_C2H2-type                                    |
| SI65_06071 | Zinc_finger,_PHD-finger                                   |
| SI65_06076 | Nicotinate_phosphoribosyltransferase-like                 |
| SI65_06091 | UTP--glucose-1-phosphate_uridylyltransferase              |
| SI65_06102 | Mannosyltransferase,_DXD                                  |
| SI65_06105 | Aminoacyl-tRNA_synthetase,_class_I                        |
| SI65_06113 | Ribosomal_protein_S5                                      |
| SI65_06150 | Ribonuclease_II/R                                         |
| SI65_06153 | Transport_protein_particle_(TRAPP)_component              |
| SI65_06155 | Glycoside_hydrolase,_family_47                            |
| SI65_06159 | Phosphoribosyltransferase                                 |
| SI65_06167 | Mammalian_uncoordinated_homology_13,_subgroup,_domain_2   |
| SI65_06188 | HIT/MYND_zinc_finger-like                                 |
| SI65_06199 | 2-oxoacid_dehydrogenase_acyltransferase,_catalytic_domain |
| SI65_06200 | Nrap_protein                                              |
| SI65_06203 | Binding_protein                                           |
| SI65_06204 | Armadillo-type_fold                                       |
| SI65_06205 | Serine/threonine-protein_kinase-like_domain               |
| SI65_06207 | Ovarian_tumour,_otubain                                   |
| SI65_06238 | Zinc_finger,_CCCH-type                                    |
| SI65_06252 | RNA_degradation                                           |

---

---

|            |                                                              |
|------------|--------------------------------------------------------------|
| SI65_06255 | Ubiquitin_mediated_proteolysis                               |
| SI65_06259 | Ribosomal_biogenesis,_methyltransferase,_EMG1/NEP1           |
| SI65_06269 | Translation_initiation_factor_2A,_beta_propellor-like_domain |
| SI65_06272 | Phosphatidylinositol-4-phosphate_5-kinase,_core              |
| SI65_06274 | 26S_proteasome_regulatory_subunit                            |
| SI65_06278 | Domain_of_unknown_function_DUF2404                           |
| SI65_06281 | Endonuclease                                                 |
| SI65_06284 | SAICAR_synthetase                                            |
| SI65_06289 | Mediator_complex,_subunit_Med12                              |
| SI65_06294 | Fps/Fes/Fer/CIP4_homology                                    |
| SI65_06295 | RNA_recognition_motif_domain                                 |
| SI65_06297 | adenyl_ribonucleotide_binding                                |
| SI65_06303 | Surfeit_locus_1                                              |
| SI65_06305 | Coenzyme_Q_biosynthesis_Coq4                                 |
| SI65_06316 | GDPGTP_exchange_factor_Sec2p                                 |
| SI65_06319 | Pre-mRNA_splicing_factor_PRP21-like_protein                  |
| SI65_06325 | Zinc_finger,_DHHC-type,_palmitoyltransferase                 |
| SI65_06329 | WD40_repeat,_subgroup                                        |
| SI65_06330 | Phosphoadenosine_phosphosulphate_reductase                   |
| SI65_06337 | Sulphate_adenylyltransferase                                 |
| SI65_06345 | Proteasome_component_(PCI)_domain                            |
| SI65_06352 | Biotin/lipoate_A/B_protein_ligase                            |
| SI65_06353 | Pre-mRNA_splicing_Prpl8-interacting_factor                   |
| SI65_06357 | DNA-directed_DNA_polymerase,_family_B,_exonuclease_domain    |
| SI65_06382 | Semialdehyde_dehydrogenase                                   |
| SI65_06400 | Uncharacterised_protein_family_UPF0016                       |
| SI65_06434 | DNA/pantothenate_metabolism_flavoprotein,_C-terminal         |
| SI65_06440 | Glycosyl_transferase,_ALG6/ALG8                              |
| SI65_06492 | Transcription_factor_IIS                                     |
| SI65_06493 | Peptidase_S16                                                |
| SI65_06499 | Chaperone_DnaJ                                               |
| SI65_06501 | Uncharacterised_protein_domain_NUC173                        |
| SI65_06513 | Ribosomal_protein_L3                                         |
| SI65_06518 | Phosphoglucose_isomerase_(PGI)                               |
| SI65_06523 | 7,8-Dihydro-6-hydroxymethylpterin-pyrophosphokinase,_HPPK    |
| SI65_06540 | eIF3g // RNA_recognition_motif_domain                        |
| SI65_06543 | Ribosomal_protein_S19/S15                                    |
| SI65_06545 | Uncharacterised_protein_family,_carbohydrate_kinase-related  |
| SI65_06592 | ATPase,_AAA-type,_core                                       |
| SI65_06599 | Ferredoxin                                                   |
| SI65_06606 | UBA/THIF-type_NAD/FAD_binding_fold                           |
| SI65_06612 | ATPase,_F1/V1/A1_complex,_alpha/beta_subunit                 |
| SI65_06613 | Mitochondrial_distribution_and_morphology_family_33,_fungi   |
| SI65_06619 | Rieske_[2Fe-2S]_iron-sulphur_domain                          |

---

---

|            |                                                                  |
|------------|------------------------------------------------------------------|
| SI65_06620 | GHMP_kinase                                                      |
| SI65_06626 | Ribosomal_protein_S12/S23                                        |
| SI65_06629 | Short-chain_dehydrogenase/reductase_SDR                          |
| SI65_06631 | Helicase                                                         |
| SI65_06644 | Ribosome_60S_biogenesis_N-terminal                               |
| SI65_06652 | L_domain-like                                                    |
| SI65_06653 | Pantoate-beta-alanine_ligase                                     |
| SI65_06658 | DNA/RNA_helicase                                                 |
| SI65_06662 | Protein_of_unknown_function_DUF775                               |
| SI65_06663 | tRNA_intron_endonuclease,_catalytic_domain-like                  |
| SI65_06664 | Ribonuclease_P/MRP,_subunit_p29                                  |
| SI65_06690 | Molybdopterin_binding                                            |
| SI65_06693 | Initiation_factor_2B-related                                     |
| SI65_06695 | Clathrin/coatmer_adaptor,_adaptin-like,_N-terminal               |
| SI65_06697 | RHO_protein_GDP_dissociation_inhibitor                           |
| SI65_06701 | Pre-mRNA_cleavage_complex_II_Clp1                                |
| SI65_06703 | Inositol_polyphosphate_kinase                                    |
| SI65_06709 | Transcription_initiation_factor_TFIID,_23-30kDa_subunit          |
| SI65_06715 | Ribosomal_protein_S5                                             |
| SI65_06718 | Transcription_factor_Tfb4                                        |
| SI65_06719 | Actin-like                                                       |
| SI65_06724 | UNC45-central                                                    |
| SI65_06727 | Skb1_methyltransferase                                           |
| SI65_06735 | EF-hand                                                          |
| SI65_06744 | Proteasome/cyclosome,_regulatory_subunit                         |
| SI65_06746 | TAP42-like_protein                                               |
| SI65_06751 | Dynein_heavy_chain                                               |
| SI65_06770 | Ribosomal_protein_L11                                            |
| SI65_06777 | Glycosyltransferase,_ALG3                                        |
| SI65_06778 | ATPase,_V1/A1_complex,_subunit_D                                 |
| SI65_06782 | TPR-like                                                         |
| SI65_06785 | Histone_methylation_DOT1                                         |
| SI65_06797 | Ras                                                              |
| SI65_06798 | Zinc_finger,_MYND-type                                           |
| SI65_06805 | WD40_repeat,_subgroup                                            |
| SI65_06810 | Eukaryotic_rRNA_processing                                       |
| SI65_06820 | Pseudouridine_synthase_II                                        |
| SI65_06823 | Mitochondrial_substrate/solute_carrier                           |
| SI65_06825 | WD40_repeat,_subgroup                                            |
| SI65_06845 | Transmembrane_receptor,_eukaryota                                |
| SI65_06849 | Helicase,_C-terminal // SNF2-related // HIP116,_Rad5p_N-terminal |
| SI65_06850 | DNA-directed_DNA_polymerase,_family_A,_palm_domain               |
| SI65_06853 | LPPG:FO_2-phospho-L-lactate_transferase_CofD/UPF0052             |
| SI65_06861 | Protein_of_unknown_function_DUF3414                              |

---

---

|            |                                                                       |
|------------|-----------------------------------------------------------------------|
| SI65_06869 | Transport_protein_particle_(TRAPP)_component                          |
| SI65_06870 | Phosphatidylethanolamine-binding_protein_PEBP                         |
| SI65_06871 | Ribosomal_protein_L4/L1e                                              |
| SI65_06876 | Crotonase,_core                                                       |
| SI65_06880 | Cystathionine_beta-synthase,_core                                     |
| SI65_06894 | DNA_polymerase_alpha,_subunit_B                                       |
| SI65_06895 | Glutamine_amidotransferase_type_1                                     |
| SI65_06896 | intracellular_membrane-bounded_organelle                              |
| SI65_06959 | Chorismate_mutase,_type_II                                            |
| SI65_06963 | WASH_complex,_F-actin_capping_protein,_alpha_subunit                  |
| SI65_06964 | HEAT // Importin-beta,_N-terminal                                     |
| SI65_07002 | Patched                                                               |
| SI65_07005 | Peptidase_M24B,_X-Pro_dipeptidase/aminopeptidase_P                    |
| SI65_07016 | Zinc_finger,_DBF-type // Regulatory_subunit_Dfp1/Him1,_central_region |
| SI65_07026 | GAT // VHS                                                            |
| SI65_07027 | Gpi16_subunit,_GPI_transamidase_component                             |
| SI65_07040 | LUC7-related                                                          |
| SI65_07044 | DNA/RNA_helicase,_DEAD/DEAH_box_type                                  |
| SI65_07047 | HECT                                                                  |
| SI65_07055 | UbiE/COQ5_methyltransferase                                           |
| SI65_07086 | Nucleoside_phosphorylase_domain                                       |
| SI65_07087 | Amine_oxidase                                                         |
| SI65_07097 | RNA_binding                                                           |
| SI65_07101 | DNA_polymerase,_Y-family,_little_finger_domain                        |
| SI65_07106 | Endonuclease/exonuclease/phosphatase                                  |
| SI65_07107 | Proteasome,_subunit_alpha/beta                                        |
| SI65_07114 | RNA_polymerase_I,_Rpa2_specific                                       |
| SI65_07115 | Cwf19-like_protein,_C-terminal_domain-2                               |
| SI65_07119 | Down-regulated-in-metastasis_protein                                  |
| SI65_07129 | Rhodanese-like                                                        |
| SI65_07131 | Xylose_isomerase,_TIM_barrel_domain                                   |
| SI65_07152 | Domain_of_unknown_function_DUF250                                     |
| SI65_07164 | EF_hand_associated,_type-2                                            |
| SI65_07169 | negative_regulation_of_transcription                                  |
| SI65_07176 | 26S_proteasome,_regulatory_subunit_Rpn7                               |
| SI65_07180 | PEX11                                                                 |
| SI65_07183 | Phosphoenolpyruvate_carboxykinase,_ATP-utilising                      |
| SI65_07185 | mRNA_capping_enzyme,_large_subunit                                    |
| SI65_07205 | Heme_A_synthase/Protoheme_IX_farnesyltransferase                      |
| SI65_07217 | Proteasome,_subunit_alpha/beta                                        |
| SI65_07226 | Ribosomal_protein_S17e                                                |
| SI65_07230 | Protein_of_unknown_function_DUF1077,_TMEM85                           |
| SI65_07236 | Prephenate_dehydrogenase                                              |
| SI65_07294 | HR1_repeat,_rho-binding                                               |

---

---

|            |                                                         |
|------------|---------------------------------------------------------|
| SI65_07314 | Fps/Fes/Fer/CIP4_homology                               |
| SI65_07316 | Myo-inositol-1-phosphate_synthase,_GAPDH-like           |
| SI65_07355 | Alcohol_dehydrogenase_GroES-like                        |
| SI65_07375 | Male_sterility,_NAD-binding                             |
| SI65_07376 | Mitochondrial_glycoprotein                              |
| SI65_07378 | DNA_primase,_small_subunit                              |
| SI65_07391 | Pyridoxal_phosphate-dependent_enzyme,_beta_subunit      |
| SI65_07397 | SAC3/GANP/Nin1/mts3/eIF-3_p25                           |
| SI65_07402 | TPR-lik                                                 |
| SI65_07403 | Vacuolar_import/degradation,_Vid27-related              |
| SI65_07462 | TLD                                                     |
| SI65_07505 | DNA/RNA-binding_protein_Kin17,_conserved_domain         |
| SI65_07506 | Bystin                                                  |
| SI65_07510 | Concanavalin_A-like_lectin/glucanase                    |
| SI65_07513 | Transketolase-like,_pyrimidine-binding_domain           |
| SI65_07518 | N2,N2-dimethylguanosine_tRNA_methyltransferase          |
| SI65_07526 | Uncharacterised_protein_family_UPF0507                  |
| SI65_07531 | Clathrin/coatomer_adaptor,_adaptin-like,_N-terminal     |
| SI65_07532 | Diacylglycerol_acyltransferase                          |
| SI65_07544 | Kinesin,_motor_domain                                   |
| SI65_07545 | Helicase,_C-terminal                                    |
| SI65_07551 | RNI-like                                                |
| SI65_07573 | Condensin_complex_subunit_2/barren                      |
| SI65_07593 | Glucosidase_II_beta_subunit-like                        |
| SI65_07608 | Fps/Fes/Fer/CIP4_homology                               |
| SI65_07609 | Ribosomal_protein_S23/S29,_mitochondrial                |
| SI65_07611 | Ribosomal_biogenesis_regulatory_protein                 |
| SI65_07658 | Prenyltransferase/squalene_oxidase                      |
| SI65_07661 | Actin-like                                              |
| SI65_07662 | GTP_cyclohydrolase_II,_RibA                             |
| SI65_07666 | SAGA-associated_factor_29                               |
| SI65_07697 | Phospholipase_C,_phosphoinositol-specific,_EF-hand-like |
| SI65_07704 | Late_secretory_pathway_protein_AVL9                     |
| SI65_07720 | Ribosomal_protein_L18/L5                                |
| SI65_07723 | Adenylate_cyclase-associated_CAP                        |
| SI65_07729 | Double-stranded_RNA-binding                             |
| SI65_07742 | CLASP_N                                                 |
| SI65_07744 | Heat_shock_protein_70                                   |
| SI65_07751 | RNA_recognition_motif_domain                            |
| SI65_07756 | RNA_transport                                           |
| SI65_07768 | Acyltransferase_ChoActase                               |
| SI65_07795 | Protein_of_unknown_function_DUF3758                     |
| SI65_07804 | Protein_synthesis_factor,_GTP-binding                   |
| SI65_07805 | Zinc_finger,_C3HC4_RING-type                            |

---

---

|            |                                                                 |
|------------|-----------------------------------------------------------------|
| SI65_07809 | Glycine_cleavage_H-protein                                      |
| SI65_07816 | Chitin_synthase_III_catalytic_subunit                           |
| SI65_07817 | Glutamine_amidotransferase,_class-II                            |
| SI65_07824 | Dynamin_central_domain                                          |
| SI65_07826 | Ribosomal_protein_L18e/L15P                                     |
| SI65_07831 | Src_homology-3_domain                                           |
| SI65_07843 | Peptidase_M16                                                   |
| SI65_07882 | Surfeit_locus_4                                                 |
| SI65_07884 | Metallo-dependent_phosphatase                                   |
| SI65_07890 | GOLD                                                            |
| SI65_07903 | Ribonuclease_II/R                                               |
| SI65_07916 | Ion_transport                                                   |
| SI65_07920 | D-tyrosyl-tRNA(Tyr)_deacylase                                   |
| SI65_07938 | mRNA_splicing_factor,_thioredoxin-like_U5_snRNP                 |
| SI65_07939 | Plus-3                                                          |
| SI65_07967 | Ubiquinone_biosynthesis_protein_Coq7                            |
| SI65_07976 | U3_small_nucleolar_RNA-associated_protein_15                    |
| SI65_07991 | PRELI/MSF1                                                      |
| SI65_07994 | Maf1_regulator                                                  |
| SI65_08001 | Domain_of_unknown_function_DUF1692                              |
| SI65_08022 | Ribosome_biogenesis_protein_Nop16                               |
| SI65_08029 | Zinc_finger,_ZZ-type                                            |
| SI65_08034 | DNA_pol_alpha_N                                                 |
| SI65_08036 | Yip1_domain                                                     |
| SI65_08051 | DEAD/DEAH-box_helicase                                          |
| SI65_08055 | Retrieval_of_early_ER_protein_Rer1                              |
| SI65_08065 | Actin-like                                                      |
| SI65_08071 | Glycosyltransferase,_ALG10                                      |
| SI65_08072 | Ribosomal_protein_L47,_mitochondrial                            |
| SI65_08074 | GDP_dissociation_inhibitor                                      |
| SI65_08078 | ATPase,_AAA-type,_core                                          |
| SI65_08082 | RNA_polymerase_II_accessory_factor,_Cdc73                       |
| SI65_08087 | Glycosyl_transferase,_family_4                                  |
| SI65_08099 | Aconitase_A                                                     |
| SI65_08103 | Eukaryotic_type_KH-domain                                       |
| SI65_08109 | Methyltransferase-related                                       |
| SI65_08114 | Domain_of_unknown_function_DUF619                               |
| SI65_08117 | Nucleolar_GTP-binding_1                                         |
| SI65_08130 | Adenylosuccinate_lyase_                                         |
| SI65_08132 | Biotin-protein_ligase                                           |
| SI65_08145 | Mitochondrial_genome_maintenance_MGM101                         |
| SI65_08178 | Protein_of_unknown_function_DUF833                              |
| SI65_08186 | Glutamyl/glutaminyI-tRNA_synthetase,_class_Ic,_catalytic_domain |
| SI65_08240 | Bacterial_Fmu_(Sun)/eukaryotic_nucleolar_NOL1/Nop2p             |

---

---

|            |                                                   |
|------------|---------------------------------------------------|
| SI65_08243 | tRNA-dihydrouridine_synthase                      |
| SI65_08248 | Gtr1/RagA_G_protein                               |
| SI65_08259 | Beta-lactamase-like                               |
| SI65_08261 | Vacuolar_protein_sorting-associated,_VPS28        |
| SI65_08278 | DNA/RNA_helicase,_DEAD/DEAH_box_type              |
| SI65_08280 | Pyridine_nucleotide-disulphide_oxidoreductase     |
| SI65_08286 | Auxin_efflux_carrier                              |
| SI65_08290 | HEAT                                              |
| SI65_08294 | Clathrin_adaptor,_mu_subunit                      |
| SI65_08299 | Fatty_acid_hydroxylase                            |
| SI65_08303 | CDP-alcohol_phosphatidyltransferase               |
| SI65_08311 | Phosphatidylserine_decarboxylase-related          |
| SI65_08334 | HEAT // Importin-beta                             |
| SI65_08341 | Maf-like_protein                                  |
| SI65_08344 | CDC45_family                                      |
| SI65_08353 | WD40_repeat,_subgroup                             |
| SI65_08365 | GTP1/OBG_subdomain                                |
| SI65_08387 | Poly(A)_polymerase,_central_domain                |
| SI65_08419 | Prefoldin_beta-like                               |
| SI65_08449 | K_Homology,_type_1,_subgroup                      |
| SI65_08456 | ATPase,_F1/V1/A1_complex,_alpha/beta_subunit      |
| SI65_08466 | Serine/threonine-protein_kinase-like_domain       |
| SI65_08469 | GrpE_nucleotide_exchange_factor                   |
| SI65_08471 | Arginine-tRNA-protein_transferase                 |
| SI65_08498 | NUDIX_hydrolase_domain                            |
| SI65_08499 | BING4,_C-terminal                                 |
| SI65_08500 | Ribosome_biogenesis_protein_BMS1                  |
| SI65_08512 | protein_transport                                 |
| SI65_08517 | Pyridine_nucleotide-disulphide_oxidoreductase,___ |
| SI65_08522 | Translocation_protein_Sec62                       |
| SI65_08527 | Acyltransferase_ChoActase                         |
| SI65_08530 | Aminotransferase_class-III                        |
| SI65_08533 | Diphthamide_synthesis,_DPH1/DHP2                  |
| SI65_08536 | ATPase,_F1_complex,_OSCP/delta_subunit            |
| SI65_08544 | Neugrin-related                                   |
| SI65_08546 | ATPase,_AAA-type,_core                            |
| SI65_08547 | Ribosomal_protein_L10e/L16                        |
| SI65_08552 | BRCT                                              |
| SI65_08589 | Legume-like_lectin                                |
| SI65_08613 | Histone_acetyl_transferase_HAT1_N-terminal        |
| SI65_08650 | Cullin,_N-terminal                                |
| SI65_08652 | Armadillo-type_fold                               |
| SI65_08657 | PBS_lyase_HEAT-like_repeat                        |
| SI65_08658 | Protein_of_unknown_function_DUF3351               |

---

---

|            |                                                             |
|------------|-------------------------------------------------------------|
| SI65_08664 | P60-like                                                    |
| SI65_08673 | Protein_of_unknown_function_DUF652                          |
| SI65_08686 | Aminoacyl-tRNA_synthetase,_class_II_(D/K/N)                 |
| SI65_08689 | Ribophorin_I                                                |
| SI65_08708 | Riboflavin_kinase_domain,_bacterial/eukaryotic              |
| SI65_08718 | COG4_transport                                              |
| SI65_08719 | WD40_repeat,_subgroup                                       |
| SI65_08728 | Protein_of_unknown_function_DUF3661,_vacuolar_transmembrane |
| SI65_08739 | Bacterial_NAD-glutamate_dehydrogenase                       |
| SI65_08740 | PRP1_splicing_factor,_N-terminal                            |
| SI65_08741 | Ribosomal_RNA_adenine_methylase_transferase                 |
| SI65_08745 | Rab-GAP/TBC_domain                                          |
| SI65_08751 | Actin-like                                                  |
| SI65_08752 | Mediator_complex,_subunit_Med14                             |
| SI65_08756 | DNA_polymerase_alpha/epsilon,_subunit_B                     |
| SI65_08757 | DWNN_domain                                                 |
| SI65_08764 | Histidine_biosynthesis                                      |
| SI65_08765 | Replication_factor-A_protein_1                              |
| SI65_08767 | Peptidase_C19,_ubiquitin_carboxyl-terminal_hydrolase_2      |
| SI65_08769 | Adenosine/AMP_deaminase                                     |
| SI65_08772 | Src_homology-3_domain                                       |
| SI65_08777 | Rad17                                                       |
| SI65_08784 | Translation_initiation_factor_SUI1                          |
| SI65_08864 | Exocyst_complex_component_Sec10                             |
| SI65_08890 | Flavodoxin/nitric_oxide_synthase                            |
| SI65_08891 | CCCH_zinc_finger                                            |
| SI65_08892 | CS_domain                                                   |
| SI65_08902 | Snf7                                                        |
| SI65_08904 | Peptidase_C19,_ubiquitin_carboxyl-terminal_hydrolase_2      |
| SI65_08914 | Vps16                                                       |
| SI65_08916 | Protein_synthesis_factor,_GTP-binding                       |
| SI65_08918 | Pre-mRNA-splicing_factor_19                                 |
| SI65_08920 | Ribosomal_protein                                           |
| SI65_08921 | Ribosomal_protein_L10/acidic_P0                             |
| SI65_08922 | Protein_of_unknown_function_DUF3722                         |
| SI65_08926 | Triosephosphate_isomerase                                   |
| SI65_08943 | Dynamin,_GTPase_domain                                      |
| SI65_08948 | Protein_phosphatase_2C-like                                 |
| SI65_08951 | Inositol_polyphosphate_kinase                               |
| SI65_08977 | Glycosyl_transferase,_family_1                              |
| SI65_08979 | Deoxyhypusine_synthase                                      |
| SI65_08982 | Bacterial_Fmu_(Sun)                                         |
| SI65_08994 | Zinc_finger,_XPA-type,_conserved_site                       |
| SI65_08995 | Eukaryotic_initiation_factor_3,_gamma_subunit               |

---

---

|            |                                                                                                 |  |
|------------|-------------------------------------------------------------------------------------------------|--|
| SI65_09065 | ARP2/3_complex,_p21-Arc_subunit                                                                 |  |
| SI65_09070 | Zinc_finger,_C3HC4_RING-type // Zinc_finger,_CCCH-type                                          |  |
| SI65_09078 | DNA-binding_SAP                                                                                 |  |
| SI65_09094 | Domain_of_unknown_function_DUF625                                                               |  |
| SI65_09102 | Ankyrin_repeat-containing_domain                                                                |  |
| SI65_09103 | Helix-loop-helix_DNA-binding_domain                                                             |  |
| SI65_09112 | Sec8_exocyst_complex_component_specific_domain                                                  |  |
| SI65_09113 | Origin_recognition_complex,_subunit_2                                                           |  |
| SI65_09114 | Arginine_biosynthesis_protein_ArgJ                                                              |  |
| SI65_09121 | SecY_protein // Translocon_Sec61/SecY,_plug_domain                                              |  |
| SI65_09137 | Glycosyl_transferase,_family_2                                                                  |  |
| SI65_09142 | Initiator_tRNA_phosphoribosyl_transferase                                                       |  |
| SI65_09192 | PLAA_family_ubiquitin_binding,_PFU // WD40_repeat,_subgroup // PUL                              |  |
| SI65_09193 | WD40_repeat,_subgroup // Small-subunit_processome,_Utp12                                        |  |
| SI65_09217 | Arp2/3_complex,_34kDa_subunit_p34-Arc                                                           |  |
| SI65_09224 | RNA_polymerase_I_specific_transcription_initiation_factor_RRN3                                  |  |
| SI65_09233 | Ubiquitin-associated/translation_elongation_factor_EF1B,_N-terminal                             |  |
| SI65_09260 | Ubiquitin_fusion_degradation_protein_UFD1                                                       |  |
| SI65_09279 | Brix_domain                                                                                     |  |
| SI65_09284 | Cytochrome_c1 // ATPase,_AAA-type,_core                                                         |  |
| SI65_09285 | Exocyst_complex_component_Sec10 // CAP_domain                                                   |  |
| SI65_09291 | Translation_initiation_factor_2A,_beta_propellor-like_domain //<br>RNA_recognition_motif_domain |  |
| SI65_09307 | Mitochondrial_import_protein_Pam17                                                              |  |
| SI65_09323 | Serine/threonine-protein_kinase-like_domain                                                     |  |
| SI65_09349 | Phox_homologous_domain                                                                          |  |
| SI65_09356 | ATPase,_AAA-type,_core                                                                          |  |
| SI65_09398 | Lyase_1,_N-terminal                                                                             |  |
| SI65_09461 | cellular_response_to_stress                                                                     |  |
| SI65_09463 | Methionine_synthase,_vitamin-B12_independent                                                    |  |
| SI65_09507 | WD40_repeat,_subgroup                                                                           |  |
| SI65_09515 | Membrane_protein,Tapt1/CMV_receptor                                                             |  |
| SI65_09522 | Domain_of_unknown_function_DUF21                                                                |  |
| SI65_09539 | Exonuclease,_RNase_T/DNA_polymerase_III                                                         |  |
| SI65_09546 | K_Homology,_type_1,_subgroup                                                                    |  |
| SI65_09549 | Zinc_finger,_FYVE-type                                                                          |  |
| SI65_09553 | WD40_repeat,_subgroup                                                                           |  |
| SI65_09555 | Pre-rRNA-processing_protein_TSR2                                                                |  |
| SI65_09566 | Pr_beta_C // Proteasome,_subunit_alpha/beta                                                     |  |
| SI65_09571 | DNA/RNA_helicase,_DEAD/DEAH_box_type                                                            |  |
| SI65_09576 | Dopey,_N-terminal                                                                               |  |
| SI65_09592 | S-adenosyl-L-methionine-dependent_methyltransferases                                            |  |
| SI65_09611 | Zinc_finger,_FYVE-type                                                                          |  |
| SI65_09624 | Chs5p-Arf1p_binding                                                                             |  |

---

---

|            |                                                   |
|------------|---------------------------------------------------|
| SI65_09636 | Peptidase_S24/S26A/S26B                           |
| SI65_09677 | Phosphatidate_cytidylyltransferase                |
| SI65_09687 | ATPase,_V0/A0_complex,_subunit_C/D                |
| SI65_09691 | Pseudouridine_synthase_I,_TruA,_alpha/beta_domain |
| SI65_09698 | Sulphate_transporter                              |
| SI65_09699 | Translation_initiation_factor_2,_alpha_subunit    |
| SI65_09729 | Transcription_factor_TFIIB,_cyclin-related        |
| SI65_09762 | Acetohydroxy_acid_isomeroeductase                 |
| SI65_09778 | DNA-binding_HORMA                                 |
| SI65_09779 | Protein_synthesis_factor,_GTP-binding             |
| SI65_09784 | Aminotransferase,_class_V/Cysteine_desulfurase    |
| SI65_09785 | Src_homology-3_domain                             |
| SI65_09829 | Putative_transmembrane_protein                    |
| SI65_09851 | Helicase                                          |
| SI65_09858 | Glucose-6-phosphate_dehydrogenase                 |
| SI65_09871 | Translation_initiation_factor_IF2/IF5             |
| SI65_09876 | Multiprotein_bridging_factor_1                    |
| SI65_09877 | WD40_repeat,_subgroup                             |
| SI65_10029 | Nucleoporin,_Nup133/Nup155-like                   |
| SI65_10034 | Exportin-1/Importin-beta-like                     |
| SI65_10051 | Vacuolar_sorting_protein_39                       |
| SI65_10063 | 2-oxoacid_dehydrogenase_acyltransferase           |
| SI65_10158 | Ribosomal_protein_S8e                             |
| SI65_10160 | Serine/threonine-protein_kinase-like_domain       |
| SI65_10164 | Fumarylacetoacetase,_C-terminal-like              |
| SI65_10174 | Protein_of_unknown_function_DUF2838               |
| SI65_10211 | ATPase,_V1                                        |
| SI65_10321 | E3_binding                                        |

---

**Table S3 Homology Genes of Mycotoxin Biosynthesis in *Aspergillus cristatus* Genome.**

| Gene name                              | Function                                     | Gene ID    | E-value of BLASTp | Score-value of InParanoid | Low osmolarity expression (FPKM) | High osmolarity expression (FPKM) | Scaffold position | Reference species              | Reference sequence | Reference paper |
|----------------------------------------|----------------------------------------------|------------|-------------------|---------------------------|----------------------------------|-----------------------------------|-------------------|--------------------------------|--------------------|-----------------|
| 1. Aflatoxin biosynthesis gene cluster |                                              |            |                   |                           |                                  |                                   |                   |                                |                    |                 |
| aflA                                   | fatty acid synthase beta subunit             | SI65_07514 | 0                 | 1281                      | 156.131                          | 92.693                            | 9                 | <i>A. parasitic</i> ATCC 56775 | AY371490           | 15              |
| aflB                                   | fatty acid synthase alpha subunit            | SI65_07515 | 0                 | 1378                      | 192.71                           | 81.4521                           | 9                 | <i>A. parasitic</i> ATCC 56775 | AY371490           | 15              |
| aflC                                   | polyketide synthase                          | SI65_03945 | 0                 | 1469                      | 1.63946                          | 3.58785                           | 3                 | <i>A. parasitic</i> ATCC 56775 | AY371490           | 15              |
| aflE                                   | reductase/dehydrogenase                      | SI65_01324 | 3.00E-156         | 436                       | 0.210877                         | 0                                 | 1                 | <i>A. parasitic</i> ATCC 56775 | AY371490           | 15              |
| aflF                                   | conversion of norsolorinic acid to averantin | SI65_08200 | 0                 | 508                       | 4.44143                          | 0.0736028                         | 12                | <i>A. parasitic</i> ATCC 56775 | AY371490           | 15              |
| aflG                                   | cytochrome P450 monooxygenase                | SI65_04769 | 9.00E-113         | 339                       | 22.7455                          | 5.61599                           | 4                 | <i>A. parasitic</i> ATCC 56775 | AY371490           | 15              |
| aflH                                   | short chain alcohol                          | SI65_01320 | 2.00E-33          | 123                       | 1.09516                          | 3.60865                           | 1                 | <i>A. parasitic</i> ATCC 56775 | AY371490           | 15              |

|      |                                                                                      |            |           |     |          |          |    |                                   |          |    |
|------|--------------------------------------------------------------------------------------|------------|-----------|-----|----------|----------|----|-----------------------------------|----------|----|
| aflI | dehydrogenase<br>conversion of<br>averufin to<br>versiconal<br>hemiacetal<br>acetate | SI65_01458 | 4.00E-12  | 114 | 41.0722  | 433.568  | 1  | <i>A. parasitic</i><br>ATCC 56775 | AY371490 | 15 |
| aflJ | esterase                                                                             | SI65_00063 | 8.00E-26  | 105 | 11.7533  | 11.4015  | 1  | <i>A. parasitic</i><br>ATCC 56775 | AY371490 | 15 |
| aflK | versicolorin B<br>synthase                                                           | SI65_07728 | 1.00E-169 | 495 | 0.521224 | 0.76745  | 10 | <i>A. parasitic</i><br>ATCC 56775 | AY371490 | 15 |
| aflL | desaturase;<br>versicolorin B<br>synthase                                            | SI65_00736 | 4.00E-104 | 339 | 11.9956  | 0.16493  | 1  | <i>A. parasitic</i><br>ATCC 56775 | AY371490 | 15 |
| aflM | dehydrogenase                                                                        | SI65_05588 | 7.00E-73  | 242 | 7.21821  | 1.34713  | 5  | <i>A. parasitic</i><br>ATCC 56775 | AY371490 | 15 |
| aflN | monooxygenase                                                                        | SI65_08927 | 2.00E-70  | 230 | 0.150057 | 0        | 15 | <i>A. parasitic</i><br>ATCC 56775 | AY371490 | 15 |
| aflO | O-methyltransfer<br>ase B                                                            | SI65_09917 | 2.00E-65  | 210 | 0.638686 | 974.212  | 22 | <i>A. parasitic</i><br>ATCC 56775 | AY371490 | 15 |
| aflP | O-methyltransfer<br>ase A                                                            | SI65_09917 | 6.00E-31  | 210 | 0.638686 | 974.212  | 22 | <i>A. parasitic</i><br>ATCC 56775 | AY371490 | 15 |
| aflQ | oxidoreductase A                                                                     | SI65_07268 | 4.00E-56  | 200 | 3.25863  | 40.2202  | 8  | <i>A. parasitic</i><br>ATCC 56775 | AY371490 | 15 |
| aflR | regulatory<br>protein                                                                | SI65_02178 | 7.00E-11  | No  | 47.9058  | 0.495291 | 2  | <i>A. parasitic</i><br>ATCC 56775 | AY371490 | 15 |
| aflS | transcription                                                                        | SI65_08570 | 3.00E-08  | No  | 1569.32  | 8.5265   | 13 | <i>A. parasitic</i>               | AY371490 | 15 |

|      |                                         |            |           |     |          |         |    |                                                 |          |    |
|------|-----------------------------------------|------------|-----------|-----|----------|---------|----|-------------------------------------------------|----------|----|
| aflT | enhancer<br>putative ABC<br>transporter | SI65_10225 | 2.00E-166 | 498 | 2.69258  | 1.19798 | 27 | ATCC 56775<br><i>A. parasitic</i><br>ATCC 56775 | AY371490 | 15 |
| aflU | cytochrome<br>P450                      | SI65_10325 | 3.00E-129 | 381 | 6.40419  | 21.0413 | 31 | <i>A. parasitic</i><br>ATCC 56775               | AY371490 | 15 |
| aflV | monooxygenase<br>cytochrome<br>P451     | SI65_05426 | 1.00E-80  | 275 | 342.311  | 51.1166 | 5  | <i>A. parasitic</i><br>ATCC 56775               | AY371490 | 15 |
| aflW | monooxygenase<br>cytochrome<br>P450     | SI65_05998 | 5.00E-109 | 334 | 0.135864 | 4.55137 | 6  | <i>A. parasitic</i><br>ATCC 56775               | AY371490 | 15 |
| aflX | monooxygenase<br>oxidoreductase B       | SI65_01458 | 6.00E-31  | 114 | 41.0722  | 433.568 | 1  | <i>A. parasitic</i><br>ATCC 56775               | AY371490 | 15 |
| aflY | hypothetical<br>protein                 | SI65_03953 | 3.00E-98  | 298 | 129.926  | 61.8284 | 3  | <i>A. parasitic</i><br>ATCC 56775               | AY371490 | 15 |

## 2. Sterigmatocystin biosynthesis Gene Cluster

|      |                                    |            |          |      |         |          |   |                               |          |    |
|------|------------------------------------|------------|----------|------|---------|----------|---|-------------------------------|----------|----|
| aflR | regulatory protein                 | SI65_02178 | 3.00E-08 | No   | 47.9058 | 0.495291 | 2 | <i>A. nidulans</i><br>FGSC 26 | U34740.1 | 20 |
| stcA | putative<br>polyketide<br>synthase | SI65_03945 | 0        | 1469 | 1.63946 | 3.58785  | 3 | <i>A. nidulans</i><br>FGSC 26 | U34740.1 | 20 |
| stcB | putative<br>polyketide<br>synthase | SI65_05771 | 9.00E-81 | 275  | 32.432  | 0.116221 | 5 | <i>A. nidulans</i><br>FGSC 26 | U34740.1 | 20 |
| stcC | putative                           | SI65_00041 | 6.00E-34 | 125  | 1.53917 | 68.4604  | 1 | <i>A. nidulans</i>            | U34740.1 | 20 |

|      |                                                                                                                                           |            |           |      |          |          |    |                                          |          |    |
|------|-------------------------------------------------------------------------------------------------------------------------------------------|------------|-----------|------|----------|----------|----|------------------------------------------|----------|----|
| stcE | peroxidase<br>putative<br>ketoreductase                                                                                                   | SI65_07450 | 4.00E-42  | 181  | 11.8378  | 0.240843 | 9  | FGSC 26<br><i>A. nidulans</i><br>FGSC 26 | U34740.1 | 20 |
| stcF | putative p450<br>monooxygenase                                                                                                            | SI65_00736 | 9.00E-108 | 339  | 11.9956  | 0.16493  | 1  | <i>A. nidulans</i><br>FGSC 26            | U34740.1 | 20 |
| stcI | putative<br>lipase/esterase                                                                                                               | SI65_00063 | 9.00E-21  | 105  | 11.7533  | 11.4015  | 1  | <i>A. nidulans</i><br>FGSC 26            | U34740.1 | 20 |
| stcJ | putative fatty acid<br>synthase alpha                                                                                                     | SI65_07514 | 1.00E-79  | 1281 | 156.131  | 92.693   | 9  | <i>A. nidulans</i><br>FGSC 26            | U34740.1 | 20 |
| stcL | putative p450<br>monooxygenase                                                                                                            | SI65_02168 | 9.00E-109 | 352  | 0.832441 | 0.229922 | 2  | <i>A. nidulans</i><br>FGSC 26            | U34740.1 | 20 |
| stcO | similar to <i>A.</i><br><i>parasiticus</i><br>putative aflatoxin<br>biosynthesis<br>protein<br>similar to <i>A.</i><br><i>parasiticus</i> | SI65_01458 | 3.00E-13  | No   | 41.0722  | 433.568  | 1  | <i>A. nidulans</i><br>FGSC 26            | U34740.1 | 20 |
| stcQ | putative aflatoxin<br>biosynthesis<br>protein                                                                                             | SI65_01458 | 1.00E-30  | 114  | 41.0722  | 433.568  | 1  | <i>A. nidulans</i><br>FGSC 26            | U34740.1 | 20 |
| stcS | putative p450<br>monooxygenase                                                                                                            | SI65_08927 | 3.00E-61  | 230  | 0.150057 | 0        | 15 | <i>A. nidulans</i><br>FGSC 26            | U34740.1 | 20 |
| stcT | putative<br>translation<br>elongation factor 1                                                                                            | SI65_03452 | 4.00E-50  | 173  | 363.157  | 93.8825  | 3  | <i>A. nidulans</i><br>FGSC 26            | U34740.1 | 20 |

|      |                                                 |            |           |      |          |         |   |                               |          |    |
|------|-------------------------------------------------|------------|-----------|------|----------|---------|---|-------------------------------|----------|----|
| stcU | gamma<br>putative<br>ketoreductase              | SI65_05588 | 2.00E-70  | 242  | 7.21821  | 1.34713 | 5 | <i>A. nidulans</i><br>FGSC 26 | U34740.1 | 20 |
| stcV | putative<br>dehydrogenase                       | SI65_01324 | 2.00E-148 | 436  | 0.210877 | 0       | 1 | <i>A. nidulans</i><br>FGSC 26 | U34740.1 | 20 |
| stcW | putative<br>FAD-containing<br>monooxygenase     | SI65_05998 | 1.00E-95  | 334  | 0.135864 | 4.55137 | 6 | <i>A. nidulans</i><br>FGSC 26 | U34740.1 | 20 |
| stcK | putative fatty acid<br>synthase beta<br>subunit | SI65_07515 | 0         | 1378 | 192.71   | 81.4521 | 9 | <i>A. nidulans</i><br>FGSC 26 | U34740.1 | 20 |

### 3. Gliotoxin biosynthesis Gene Cluster

|      |                                     |            |           |     |         |          |    |                              |          |    |
|------|-------------------------------------|------------|-----------|-----|---------|----------|----|------------------------------|----------|----|
| gliA | MFS gliotoxin<br>efflux transporter | SI65_10225 | 2.00E-141 | No  | 2.69258 | 1.19798  | 27 | <i>A. fumigates</i><br>Af293 | AY838877 | 17 |
| gliK | Gamma-glutamyl<br>cyclotransferase  | SI65_09278 | 4.00E-27  | 110 | 97.7115 | 74.1883  | 17 | <i>A. fumigates</i><br>Af293 | AY838877 | 17 |
| gliG | glutathione<br>S-transferase        | SI65_05852 | 3.00E-23  | 94  | 27.541  | 80.4417  | 5  | <i>A. fumigates</i><br>Af293 | AY838877 | 17 |
| gliM | O-methyltransfera<br>se             | SI65_08573 | 7.00E-18  | No  | 6.21553 | 0.245922 | 13 | <i>A. fumigates</i><br>Af293 | AY838877 | 17 |
| gliP | nonribosomal<br>peptide synthase    | SI65_10013 | 0         | 924 | 369.781 | 0.957772 | 24 | <i>A. fumigates</i><br>Af293 | AY838877 | 17 |
| gliJ | membrane<br>dipeptidase             | SI65_10086 | 1.00E-88  | 271 | 123.203 | 32.2374  | 25 | <i>A. fumigates</i><br>Af293 | AY838877 | 17 |
| gliI | Aminotransferase                    | SI65_00213 | 2.00E-50  | 173 | 70.5362 | 139.984  | 1  | <i>A. fumigates</i><br>Af293 | AY838877 | 17 |

|      |                                                                 |            |          |     |         |          |   |                              |          |    |
|------|-----------------------------------------------------------------|------------|----------|-----|---------|----------|---|------------------------------|----------|----|
| gliZ | GAL4-like Zn2Cys6<br>binuclear cluster<br>DNA-binding<br>domain | SI65_02833 | 3.00E-08 | No  | 2.10206 | 0.978578 | 2 | <i>A. fumigates</i><br>Af293 | AY838877 | 17 |
| gliC | cytochrome P450<br>oxidoreductase                               | SI65_02538 | 3.00E-17 | No  | 47.8642 | 7.62516  | 2 | <i>A. fumigates</i><br>Af293 | AY838877 | 17 |
| gliT | thioredoxin<br>reductase                                        | SI65_03923 | 3.00E-41 | 146 | 100.492 | 2.30086  | 3 | <i>A. fumigates</i><br>Af293 | AY838877 | 17 |
| gliF | cytochrome P450<br>oxidoreductase                               | SI65_03683 | 3.00E-53 | 184 | 4.98223 | 1.12875  | 3 | <i>A. fumigates</i><br>Af293 | AY838877 | 17 |
| gliN | methyltransferase                                               | SI65_09564 | 3.00E-17 | 82  | 5.04975 | 0.359262 | 4 | <i>A. fumigates</i><br>Af293 | AY838877 | 17 |

#### 4. Zearalenone biosynthesis Gene Cluster

|     |                                           |            |           |      |         |          |    |                               |          |    |
|-----|-------------------------------------------|------------|-----------|------|---------|----------|----|-------------------------------|----------|----|
| ACA | Ca2+ ATPase                               | SI65_02821 | 0         | 1181 | 6.51965 | 7.5613   | 2  | <i>F. graminearum</i><br>PH-1 | DQ019316 | 19 |
| ALD | aldehyde<br>dehydrogenase<br>heterokaryon | SI65_10177 | 1.00E-127 | 378  | 29.6874 | 9.28873  | 26 | <i>F. graminearum</i><br>PH-1 | DQ019316 | 19 |
| HET | incompatibility<br>protein                | SI65_03339 | 2.00E-24  | No   | 22.4354 | 4.11164  | 3  | <i>F. graminearum</i><br>PH-1 | DQ019316 | 19 |
| KAT | K+ channel protein                        | SI65_08176 | 8.00E-127 | 362  | 1.47241 | 0.478249 | 12 | <i>F. graminearum</i><br>PH-1 | DQ019316 | 19 |
| MCT | monocarboxylate                           | SI65_03765 | 5.00E-79  | 273  | 1.51132 | 0.659147 | 3  | <i>F. graminearum</i>         | DQ019316 | 19 |

|                                              |                                                                                   |            |           |      |         |           |    |                                      |             |    |
|----------------------------------------------|-----------------------------------------------------------------------------------|------------|-----------|------|---------|-----------|----|--------------------------------------|-------------|----|
|                                              | transporter<br>like-protein                                                       |            |           |      |         |           |    |                                      | <i>PH-1</i> |    |
| NPS                                          | non-ribosomal<br>peptide synthetase                                               | SI65_05056 | 0         | 937  | 52.4799 | 20.7725   | 4  | <i>F. graminearum</i><br><i>PH-1</i> | DQ019316    | 19 |
| PKS13                                        | polyketide<br>synthase(required<br>for zearalenone<br>production)                 | SI65_03276 | 0         | 1027 | 10.3076 | 0.0669255 | 3  | <i>F. graminearum</i><br><i>PH-1</i> | DQ019316    | 19 |
| PKS4                                         | polyketide<br>synthase(required<br>for zearalenone<br>production)                 | SI65_02847 | 0         | No   | 1326.82 | 1.82172   | 2  | <i>F. graminearum</i><br><i>PH-1</i> | DQ019316    | 19 |
| STK                                          | protein kinase<br>Eg2-like protein                                                | SI65_03555 | 2.00E-135 | 380  | 24.4849 | 14.6216   | 3  | <i>F. graminearum</i><br><i>PH-1</i> | DQ019316    | 19 |
| ZEB1                                         | isoamyl alcohol<br>oxidase(required<br>for zearalenone<br>production)             | SI65_03320 | 1.00E-180 | 532  | 14.7469 | 25.0216   | 3  | <i>F. graminearum</i><br><i>PH-1</i> | DQ019316    | 19 |
| ZEB2                                         | bZIP<br>domain-containing<br>transcription<br>factor(required for<br>zearalenone) | SI65_03015 | 1.00E-06  | No   | 193.251 | 160.526   | 2  | <i>F. graminearum</i><br><i>PH-1</i> | DQ019316    | 19 |
| <b>5.Fumonisin biosynthesis Gene Cluster</b> |                                                                                   |            |           |      |         |           |    |                                      |             |    |
| cpm1                                         | cytochrome P450<br>monooxygenase                                                  | SI65_09993 | 1.00E-103 | 320  | 20.663  | 7.19406   | 23 | <i>F. oxysporum</i><br>FRCO-1890     | EU449979    | 16 |

|       |                                                                           |            |           |      |          |           |    |                                  |          |    |
|-------|---------------------------------------------------------------------------|------------|-----------|------|----------|-----------|----|----------------------------------|----------|----|
| fum1  | Acyl transferase domain in polyketide synthase(PKS) enzymes               | SI65_02164 | 0         | 1921 | 0.290841 | 0.430763  | 2  | <i>F. oxysporum</i><br>FRCO-1890 | EU449979 | 16 |
| fum10 | Acyl-CoA synthetase (AMP-forming)/AMP-acid ligase mitochondrial           | SI65_03213 | 8.00E-95  | 292  | 44.708   | 106.816   | 2  | <i>F. oxysporum</i><br>FRCO-1890 | EU449979 | 16 |
| fum11 | tricarboxylate transporter fumonisin                                      | SI65_06193 | 2.00E-112 | 321  | 37.5793  | 18.6847   | 6  | <i>F. oxysporum</i><br>FRCO-1890 | EU449979 | 16 |
| fum13 | cluster-short-chain Dehydrogenase(fumonisin 3-keto fumonisin              | SI65_00023 | 8.00E-29  | 113  | 12.1862  | 163.421   | 1  | <i>F. oxysporum</i><br>FRCO-1890 | EU449979 | 16 |
| fum14 | cluster-peptid synthase condensation domain(nrps c domain like) fumonisin | SI65_01682 | 9.00E-20  | 91   | 0.130755 | 0.0488016 | 1  | <i>F. oxysporum</i><br>FRCO-1890 | EU449979 | 16 |
| fum15 | cluster-P450 monooxygenase                                                | SI65_09492 | 3.00E-135 | 399  | 7.0156   | 1.43238   | 19 | <i>F. oxysporum</i><br>FRCO-1890 | EU449979 | 16 |

|       |                                                       |            |           |     |          |          |    |                                  |          |    |
|-------|-------------------------------------------------------|------------|-----------|-----|----------|----------|----|----------------------------------|----------|----|
| fum16 | fumonisin<br>cluster-fatty<br>acyl-CoA Synthase       | SI65_06526 | 0         | 597 | 124.534  | 139.017  | 7  | <i>F. oxysporum</i><br>FRCO-1890 | EU449979 | 16 |
| fum17 | hypothetical<br>protein                               | SI65_04379 | 6.00E-106 | 351 | 59.0469  | 34.5105  | 4  | <i>F. oxysporum</i><br>FRCO-1890 | EU449979 | 16 |
| fum18 | fumonisin<br>cluster-longevity<br>assurance factor    | SI65_03168 | 2.00E-84  | 272 | 50.1691  | 17.5612  | 2  | <i>F. oxysporum</i><br>FRCO-1890 | EU449979 | 16 |
| fum19 | fumonisin<br>biosynthetic ABC<br>transporter          | SI65_10152 | 0         | 787 | 20.0998  | 11.9259  | 26 | <i>F. oxysporum</i><br>FRCO-1890 | EU449979 | 16 |
| fum2  | fumonisin<br>cluster-P450<br>monooxygenase            | SI65_02168 | 2.00E-117 | 352 | 0.832441 | 0.229922 | 2  | <i>F. oxysporum</i><br>FRCO-1890 | EU449979 | 16 |
| fum21 | fumonisin<br>biosynthetic<br>transcription<br>factor  | SI65_05581 | 7.00E-13  | 107 | 48.3784  | 53.9968  | 5  | <i>F. oxysporum</i><br>FRCO-1890 | EU449979 | 16 |
| fum3  | fumonisin<br>cluster-dioxygenas<br>e(C-5 hydroxylase) | SI65_05609 | 3.00E-16  | 76  | 79.584   | 10.3441  | 5  | <i>F. oxysporum</i><br>FRCO-1890 | EU449979 | 16 |
| fum6  | fumonisin<br>cluster-P450<br>monooxygenase            | SI65_07364 | 0         | 742 | 26.6113  | 33.2308  | 9  | <i>F. oxysporum</i><br>FRCO-1890 | EU449979 | 16 |
| fum7  | fumonisin<br>biosynthetic                             | SI65_01078 | 9.00E-89  | 277 | 1.90784  | 7.59041  | 1  | <i>F. oxysporum</i><br>FRCO-1890 | EU449979 | 16 |

|                                                |                                                            |            |           |      |         |         |    |                                  |          |    |
|------------------------------------------------|------------------------------------------------------------|------------|-----------|------|---------|---------|----|----------------------------------|----------|----|
| fum8                                           | dehydrogenase<br>fumonisin<br>cluster-aminotrans<br>ferase | SI65_07829 | 9.00E-39  | 145  | 69.1476 | 55.0069 | 10 | <i>F. oxysporum</i><br>FRCO-1890 | EU449979 | 16 |
| <b>6. Ochratoxin biosynthesis Gene Cluster</b> |                                                            |            |           |      |         |         |    |                                  |          |    |
| NPS                                            | non-ribosomal<br>peptide synthetase                        | SI65_05056 | 0         | 937  | 52.4799 | 20.7725 | 4  | <i>P. nordicum</i><br>BFE487     | AY557343 | 18 |
| ASP                                            | alkaline serine<br>protease                                | SI65_09887 | 0         | 1249 | 159.453 | 3.50237 | 22 | <i>P. nordicum</i><br>BFE487     | AY557343 | 18 |
| otapksPN                                       | ochratoxin A<br>polyketide<br>synthase                     | SI65_09913 | 3.00E-124 | 369  | 26.5317 | 10.802  | 22 | <i>P. nordicum</i><br>BFE487     | AY557343 | 18 |

---
